# Supplementary material
Source: PubMed Central journal article supplement (PMC8303030)
Supplement: mmc1.pdf [file mmc1.pdf]

# THE LANCET

## Supplementary appendix

This appendix formed part of the original submission and has been peer reviewed.  
We post it as supplied by the authors.

Supplement to: Drake TM, Riad AM, Fairfield CJ, et al. Characterisation of in-hospital complications associated with COVID-19 using the ISARIC WHO Clinical Characterisation Protocol UK: a prospective, multicentre cohort study. *Lancet* 2021; **398**: 223–37.

## 2 Contents

|    |                                                                                                 |    |
|----|-------------------------------------------------------------------------------------------------|----|
| 3  | Supplementary table 1 – Definition of in-hospital complications .....                           | 1  |
| 4  | Supplementary table 2 – Complication rates by SARS-CoV-2 RT-PCR positivity status .....         | 3  |
| 5  | Supplementary table 3A - Specific complications stratified by age and sex in adults admitted to |    |
| 6  | hospital with severe COVID-19. ....                                                             | 4  |
| 7  | Supplementary table 3B – Comparison between suspected and highly likely bacterial               |    |
| 8  | pneumonia by age and sex in adults admitted to hospital with severe COVID-19. ....              | 6  |
| 9  | Supplementary table 3C- Comparison between suspected and highly likely bacterial pneumonia      |    |
| 10 | by number of existing comorbidities in adults admitted to hospital with severe COVID-19. ....   | 7  |
| 11 | Supplementary table 4 - Organ specific complications stratified by age and presence of          |    |
| 12 | comorbidity in adults admitted to hospital with severe COVID-19 in adults admitted to hospital  |    |
| 13 | with severe COVID-19. ....                                                                      | 8  |
| 14 | Supplementary table 5 - Specific complications stratified by age and presence of comorbidity in |    |
| 15 | adults admitted to hospital with severe COVID-19. ....                                          | 9  |
| 16 | Supplementary table 6 - Outcomes by organ specific complications in adults admitted to hospital |    |
| 17 | with severe COVID-19 who survived.....                                                          | 12 |
| 18 | Supplementary table 7 - Outcomes by organ specific complications in adults admitted to hospital |    |
| 19 | with severe COVID-19 who died. ....                                                             | 13 |
| 20 | Supplementary table 8 - Effect of complications on survival (adjusted Cox proportional hazards  |    |
| 21 | models) for figure 2C.....                                                                      | 14 |
| 22 | Supplementary table 8A - Any complication .....                                                 | 14 |
| 23 | Supplementary table 8B - Systemic complications .....                                           | 15 |
| 24 | Supplementary table 8C - Renal complications/ acute kidney injury .....                         | 16 |
| 25 | Supplementary table 8D - Gastrointestinal and liver complications.....                          | 17 |
| 26 | Supplementary table 8E - Cardiovascular complications .....                                     | 18 |
| 27 | Supplementary table 8F - Neurological complications .....                                       | 19 |
| 28 | Supplementary table 8G - Respiratory complications .....                                        | 20 |
| 29 | Supplementary table 9 - Effect of complications on odds of critical care admission (adjusted    |    |
| 30 | logistic regression models) for figure 2D .....                                                 | 21 |
| 31 | Supplementary table 9A - Any complication .....                                                 | 21 |
| 32 | Supplementary table 9B - Systemic complications .....                                           | 22 |
| 33 | Supplementary table 9C - Renal complications/ acute kidney injury .....                         | 23 |
| 34 | Supplementary table 9D - Gastrointestinal and liver complications.....                          | 24 |
| 35 | Supplementary table 9E - Cardiovascular complications .....                                     | 25 |

|    |                                                                                                 |    |
|----|-------------------------------------------------------------------------------------------------|----|
| 36 | Supplementary table 9F - Neurological complications .....                                       | 26 |
| 37 | Supplementary table 9G - Respiratory complications .....                                        | 27 |
| 38 | Supplementary table 10 - Effect of complications on odds of worse ability to self-care at       |    |
| 39 | discharge (adjusted logistic regression models) for figure 4C.....                              | 28 |
| 40 | Supplementary table 10A - Any complication.....                                                 | 28 |
| 41 | Supplementary table 10B - Systemic complications.....                                           | 29 |
| 42 | Supplementary table 10C - Renal complications/ acute kidney injury .....                        | 30 |
| 43 | Supplementary table 10D - Gastrointestinal and liver complications.....                         | 31 |
| 44 | Supplementary table 10E - Cardiovascular complications .....                                    | 32 |
| 45 | Supplementary table 10F - Neurological complications .....                                      | 33 |
| 46 | Supplementary table 10G - Respiratory complications .....                                       | 34 |
| 47 | Supplementary figure 1 – Heatmap of co-occurrence of complications. Measured using the          |    |
| 48 | Jaccard similarity index, where 1 is perfect co-occurrence and 0 is no co-occurrence. ....      | 35 |
| 49 | Supplementary figure 2 - Adjusted effect of age and sex on organ specific complications in      |    |
| 50 | adults with severe COVID-19 (also adjusted for centre as a random effect).....                  | 36 |
| 51 | Supplementary figure 3 - Effect of age, sex and deprivation on specific complications in adults |    |
| 52 | with COVID-19 (also adjusted for centre as a random effect).....                                | 37 |
| 53 | Supplementary figure 3 (continued) - Effect of age, sex and deprivation on specific             |    |
| 54 | complications in adults with COVID-19 (also adjusted for centre as a random effect). ....       | 38 |
| 55 | Supplementary figure 4.....                                                                     | 39 |
| 56 | Supplementary figure 5.....                                                                     | 40 |
| 57 | Supplementary figure 6.....                                                                     | 41 |
| 58 | Supplementary figure 7.....                                                                     | 42 |
| 59 | Supplementary figure 8.....                                                                     | 43 |
| 60 | Supplementary figure 9.....                                                                     | 44 |
| 61 | Supplementary figure 11.....                                                                    | 45 |
| 62 | Supplementary figure 12.....                                                                    | 46 |
| 63 | Supplementary figure 13.....                                                                    | 47 |
| 64 |                                                                                                 |    |

65 **Supplementary tables**66 **Supplementary table 1 – Definition of in-hospital complications**

| <b>Organ specific complication</b> | <b>Complication within this group</b>             | <b>Definition</b>                                                                                                                                                                                                                                                                                                                                                                             |
|------------------------------------|---------------------------------------------------|-----------------------------------------------------------------------------------------------------------------------------------------------------------------------------------------------------------------------------------------------------------------------------------------------------------------------------------------------------------------------------------------------|
| Respiratory                        | Bacterial pneumonia (highly likely)               | Clinically significant organism detected in sputum or deep respiratory culture                                                                                                                                                                                                                                                                                                                |
|                                    | Bacterial pneumonia (suspected)                   | Defined clinically in patient healthcare record                                                                                                                                                                                                                                                                                                                                               |
|                                    | Likely Acute Respiratory Distress Syndrome (ARDS) | Defined clinically in patient record or defined as one of the following combinations: <ul style="list-style-type: none"> <li>- receiving extracorporeal membrane oxygenation</li> <li>- being nursed in a prone position and receiving invasive mechanical ventilation</li> <li>- receiving mechanical ventilation and having a PF (<math>PaO_2/FiO_2</math>) ratio of 300 or less</li> </ul> |
|                                    | Empyema                                           | Defined clinically in patient healthcare record                                                                                                                                                                                                                                                                                                                                               |
|                                    | Pneumothorax                                      | Defined clinically in patient healthcare record                                                                                                                                                                                                                                                                                                                                               |
|                                    | Pleural effusion                                  | Defined clinically in patient healthcare record                                                                                                                                                                                                                                                                                                                                               |
| Neurological                       | Meningitis                                        | Defined clinically in patient healthcare record                                                                                                                                                                                                                                                                                                                                               |
|                                    | Encephalitis                                      | Defined clinically in patient healthcare record                                                                                                                                                                                                                                                                                                                                               |
|                                    | Seizure                                           | Defined clinically in patient healthcare record                                                                                                                                                                                                                                                                                                                                               |
|                                    | Stroke                                            | Defined clinically in patient healthcare record                                                                                                                                                                                                                                                                                                                                               |
| Cardiovascular                     | Thromboembolism                                   | Defined clinically in patient healthcare record                                                                                                                                                                                                                                                                                                                                               |
|                                    | Heart Failure                                     | Defined clinically in patient healthcare record                                                                                                                                                                                                                                                                                                                                               |
|                                    | Myocarditis                                       | Defined clinically in patient healthcare record                                                                                                                                                                                                                                                                                                                                               |
|                                    | Endocarditis                                      | Defined clinically in patient healthcare record                                                                                                                                                                                                                                                                                                                                               |
|                                    | Arrhythmia                                        | Defined clinically in patient healthcare record                                                                                                                                                                                                                                                                                                                                               |
|                                    | Cardiomyopathy                                    | Defined clinically in patient healthcare record                                                                                                                                                                                                                                                                                                                                               |
|                                    | Myocardial Ischaemia                              | Defined clinically in patient healthcare record                                                                                                                                                                                                                                                                                                                                               |
|                                    | Cardiac Arrest                                    | Defined clinically in patient healthcare record                                                                                                                                                                                                                                                                                                                                               |
| Renal                              | Acute Kidney Injury                               | Creatinine rise which corresponded to Kidney Disease Improving Global Outcomes (KDIGO) stage I or above (creatinine rise $\geq 1.5x$ baseline value or by $\geq 26.5 \mu\text{mol/L}$ )<br><br>Urine output not included within this definition                                                                                                                                               |
| Gastrointestinal                   | Acute Liver Injury                                | Any of the following: <ul style="list-style-type: none"> <li>- International normalised ratio (INR) rise of 2.5 times or greater than the lowest entered value</li> <li>- INR of over 4.5 (in the absence of warfarin therapy)</li> </ul>                                                                                                                                                     |

|          |                                        |                                                                                                                                                                                                                                                                                                |
|----------|----------------------------------------|------------------------------------------------------------------------------------------------------------------------------------------------------------------------------------------------------------------------------------------------------------------------------------------------|
|          |                                        | <ul style="list-style-type: none"> <li>- Alanine aminotransferase (ALT) rise of greater than 10 times the lowest value</li> <li>- ALT over 150</li> <li>- Bilirubin rise of greater than 15</li> <li>- Bilirubin greater than 55 (in the absence of any pre-existing liver disease)</li> </ul> |
|          | Pancreatitis                           | Defined clinically in patient healthcare record                                                                                                                                                                                                                                                |
|          | Gastrointestinal haemorrhage           | Defined clinically in patient healthcare record                                                                                                                                                                                                                                                |
| Systemic | Coagulopathy                           | Defined clinically in patient healthcare record                                                                                                                                                                                                                                                |
|          | Disseminated Intravascular Coagulation | Defined clinically in patient healthcare record                                                                                                                                                                                                                                                |
|          | Anaemia                                | Defined clinically in patient healthcare record                                                                                                                                                                                                                                                |
|          | Bloodstream Infection                  | Clinically significant sample in blood culture                                                                                                                                                                                                                                                 |

68 **Supplementary table 2 – Complication rates by SARS-CoV-2 RT-PCR positivity status**

|       |               | Total        | Any complication | Systemic     | Renal        | Gastrointestinal | Cardiovascular | Neurological | Respiratory  |
|-------|---------------|--------------|------------------|--------------|--------------|------------------|----------------|--------------|--------------|
| Total | N (%)         | 73197        | 36367 (49.7)     | 11895 (16.3) | 17752 (24.3) | 7901 (10.8)      | 8973 (12.3)    | 3115 (4.3)   | 13486 (18.4) |
| PCR   | Confirmed     | 62894 (85.9) | 32044 (50.9)     | 10617 (16.9) | 15829 (25.2) | 6916 (11.0)      | 7935 (12.6)    | 2753 (4.4)   | 11849 (18.8) |
|       | Not confirmed | 10303 (14.1) | 4323 (42.0)      | 1278 (12.4)  | 1923 (18.7)  | 985 (9.6)        | 1038 (10.1)    | 362 (3.5)    | 1637 (15.9)  |

69 Percentage values are row percentages, except for totals which represent column percentages.

70 **Supplementary table 3A - Specific complications stratified by age and sex in adults**  
71 **admitted to hospital with severe COVID-19.**

|        |                                         | Total       | Age (years) |            |            |             |             |             |              |             |
|--------|-----------------------------------------|-------------|-------------|------------|------------|-------------|-------------|-------------|--------------|-------------|
|        |                                         |             | 19-29       | 30-39      | 40-49      | 50-59       | 60-69       | 70-79       | 80-89        | 90+         |
| Female | Total N (%)                             | 31977       | 882 (2.8)   | 1359 (4.2) | 1960 (6.1) | 3488 (10.9) | 4231 (13.2) | 6685 (20.9) | 9178 (28.7)  | 4194 (13.1) |
|        | Cryptogenic organizing pneumonia        | 42 (0.1)    | 0 (0.0)     | 2 (0.1)    | 2 (0.1)    | 4 (0.1)     | 8 (0.2)     | 6 (0.1)     | 10 (0.1)     | 10 (0.2)    |
|        | Likely ARDS                             | 3251 (10.2) | 53 (6.0)    | 145 (10.7) | 313 (16.0) | 550 (15.8)  | 703 (16.6)  | 662 (9.9)   | 602 (6.6)    | 223 (5.3)   |
|        | Pneumothorax                            | 227 (0.7)   | 6 (0.7)     | 11 (0.8)   | 25 (1.3)   | 39 (1.1)    | 57 (1.3)    | 52 (0.8)    | 28 (0.3)     | 9 (0.2)     |
|        | Pleural effusion                        | 1940 (6.1)  | 16 (1.8)    | 47 (3.5)   | 84 (4.3)   | 143 (4.1)   | 269 (6.4)   | 421 (6.3)   | 641 (7.0)    | 319 (7.6)   |
|        | Highly likely Bacterial Pneumonia       | 99 (0.3)    | 2 (0.2)     | 4 (0.3)    | 14 (0.7)   | 25 (0.7)    | 21 (0.5)    | 21 (0.3)    | 10 (0.1)     | 2 (0.0)     |
|        | Meningitis / Encephalitis               | 61 (0.2)    | 2 (0.2)     | 4 (0.3)    | 7 (0.4)    | 7 (0.2)     | 19 (0.4)    | 8 (0.1)     | 11 (0.1)     | 3 (0.1)     |
|        | Seizure                                 | 331 (1.0)   | 6 (0.7)     | 17 (1.3)   | 22 (1.1)   | 46 (1.3)    | 46 (1.1)    | 79 (1.2)    | 87 (0.9)     | 28 (0.7)    |
|        | Stroke / Cerebrovascular accident       | 483 (1.5)   | 2 (0.2)     | 5 (0.4)    | 14 (0.7)   | 32 (0.9)    | 67 (1.6)    | 106 (1.6)   | 175 (1.9)    | 82 (2.0)    |
|        | Other neurological complication         | 537 (1.7)   | 7 (0.8)     | 8 (0.6)    | 22 (1.1)   | 42 (1.2)    | 69 (1.6)    | 105 (1.6)   | 201 (2.2)    | 83 (2.0)    |
|        | Congestive heart failure                | 1133 (3.5)  | 0 (0.0)     | 5 (0.4)    | 16 (0.8)   | 34 (1.0)    | 93 (2.2)    | 243 (3.6)   | 486 (5.3)    | 256 (6.1)   |
|        | Endocarditis / Myocarditis Pericarditis | 83 (0.3)    | 1 (0.1)     | 5 (0.4)    | 6 (0.3)    | 11 (0.3)    | 19 (0.4)    | 23 (0.3)    | 14 (0.2)     | 4 (0.1)     |
|        | Myocarditis / Pericarditis              | 70 (0.2)    | 3 (0.3)     | 4 (0.3)    | 5 (0.3)    | 13 (0.4)    | 16 (0.4)    | 13 (0.2)    | 10 (0.1)     | 6 (0.1)     |
|        | Cardiomyopathy                          | 79 (0.2)    | 0 (0.0)     | 1 (0.1)    | 6 (0.3)    | 10 (0.3)    | 8 (0.2)     | 16 (0.2)    | 29 (0.3)     | 9 (0.2)     |
|        | Cardiac arrhythmia                      | 1907 (6.0)  | 15 (1.7)    | 30 (2.2)   | 87 (4.4)   | 140 (4.0)   | 226 (5.3)   | 429 (6.4)   | 680 (7.4)    | 300 (7.2)   |
|        | Cardiac ischemia                        | 381 (1.2)   | 0 (0.0)     | 3 (0.2)    | 6 (0.3)    | 29 (0.8)    | 42 (1.0)    | 90 (1.3)    | 138 (1.5)    | 73 (1.7)    |
|        | Cardiac arrest                          | 653 (2.0)   | 5 (0.6)     | 13 (1.0)   | 25 (1.3)   | 65 (1.9)    | 93 (2.2)    | 161 (2.4)   | 200 (2.2)    | 91 (2.2)    |
|        | Bloodstream infection                   | 404 (1.3)   | 6 (0.7)     | 22 (1.6)   | 34 (1.7)   | 48 (1.4)    | 71 (1.7)    | 76 (1.1)    | 105 (1.1)    | 42 (1.0)    |
|        | Coagulation disorder / DIC              | 724 (2.3)   | 14 (1.6)    | 24 (1.8)   | 46 (2.3)   | 101 (2.9)   | 135 (3.2)   | 146 (2.2)   | 190 (2.1)    | 68 (1.6)    |
|        | Anaemia                                 | 4126 (12.9) | 81 (9.2)    | 160 (11.8) | 250 (12.8) | 432 (12.4)  | 628 (14.8)  | 856 (12.8)  | 1188 (12.9)  | 531 (12.7)  |
|        | Rhabdomyolysis / Myositis               | 99 (0.3)    | 3 (0.3)     | 1 (0.1)    | 1 (0.1)    | 9 (0.3)     | 11 (0.3)    | 15 (0.2)    | 36 (0.4)     | 23 (0.5)    |
|        | Acute Kidney Injury                     | 6612 (20.7) | 51 (5.8)    | 124 (9.1)  | 251 (12.8) | 642 (18.4)  | 933 (22.1)  | 1533 (22.9) | 2137 (23.3)  | 941 (22.4)  |
|        | Gastrointestinal haemorrhage            | 325 (1.0)   | 5 (0.6)     | 8 (0.6)    | 8 (0.4)    | 25 (0.7)    | 48 (1.1)    | 57 (0.9)    | 120 (1.3)    | 54 (1.3)    |
|        | Pancreatitis                            | 108 (0.3)   | 5 (0.6)     | 9 (0.7)    | 9 (0.5)    | 17 (0.5)    | 24 (0.6)    | 16 (0.2)    | 22 (0.2)     | 6 (0.1)     |
|        | Deep Vein Thrombosis                    | 167 (0.5)   | 2 (0.2)     | 10 (0.7)   | 9 (0.5)    | 31 (0.9)    | 33 (0.8)    | 30 (0.4)    | 41 (0.4)     | 11 (0.3)    |
|        | Pulmonary Embolism                      | 382 (1.2)   | 3 (0.3)     | 15 (1.1)   | 27 (1.4)   | 65 (1.9)    | 83 (2.0)    | 78 (1.2)    | 90 (1.0)     | 21 (0.5)    |
|        | Liver Injury                            | 2366 (7.4)  | 48 (5.4)    | 113 (8.3)  | 192 (9.8)  | 409 (11.7)  | 430 (10.2)  | 475 (7.1)   | 500 (5.4)    | 199 (4.7)   |
| Male   | Total N (%)                             | 41025       | 612 (1.5)   | 1385 (3.4) | 3021 (7.4) | 5591 (13.6) | 6882 (16.8) | 9841 (24.0) | 10662 (26.0) | 3031 (7.4)  |
|        | Cryptogenic organizing pneumonia        | 50 (0.1)    | 0 (0.0)     | 2 (0.1)    | 4 (0.1)    | 9 (0.2)     | 12 (0.2)    | 10 (0.1)    | 12 (0.1)     | 1 (0.0)     |
|        | Likely ARDS                             | 6417 (15.6) | 62 (10.1)   | 247 (17.8) | 697 (23.1) | 1376 (24.6) | 1540 (22.4) | 1411 (14.3) | 889 (8.3)    | 195 (6.4)   |
|        | Pneumothorax                            | 466 (1.1)   | 6 (1.0)     | 20 (1.4)   | 47 (1.6)   | 113 (2.0)   | 121 (1.8)   | 87 (0.9)    | 55 (0.5)     | 17 (0.6)    |
|        | Pleural effusion                        | 2583 (6.3)  | 23 (3.8)    | 53 (3.8)   | 145 (4.8)  | 322 (5.8)   | 452 (6.6)   | 631 (6.4)   | 723 (6.8)    | 234 (7.7)   |
|        | Highly likely Bacterial Pneumonia       | 260 (0.6)   | 1 (0.2)     | 10 (0.7)   | 38 (1.3)   | 78 (1.4)    | 60 (0.9)    | 54 (0.5)    | 17 (0.2)     | 2 (0.1)     |
|        | Meningitis / Encephalitis               | 95 (0.2)    | 5 (0.8)     | 5 (0.4)    | 14 (0.5)   | 20 (0.4)    | 23 (0.3)    | 12 (0.1)    | 16 (0.2)     | 0 (0.0)     |
|        | Seizure                                 | 497 (1.2)   | 13 (2.1)    | 33 (2.4)   | 45 (1.5)   | 89 (1.6)    | 87 (1.3)    | 105 (1.1)   | 105 (1.0)    | 20 (0.7)    |
|        | Stroke / Cerebrovascular accident       | 729 (1.8)   | 1 (0.2)     | 12 (0.9)   | 36 (1.2)   | 75 (1.3)    | 147 (2.1)   | 205 (2.1)   | 209 (2.0)    | 44 (1.5)    |
|        | Other neurological complication         | 696 (1.7)   | 7 (1.1)     | 18 (1.3)   | 31 (1.0)   | 90 (1.6)    | 98 (1.4)    | 175 (1.8)   | 211 (2.0)    | 66 (2.2)    |

|                                            | Total           | Age (years)  |            |            |             |             |             |             |            |
|--------------------------------------------|-----------------|--------------|------------|------------|-------------|-------------|-------------|-------------|------------|
|                                            |                 | 19-29        | 30-39      | 40-49      | 50-59       | 60-69       | 70-79       | 80-89       | 90+        |
| Congestive heart failure                   | 1387<br>(3.4)   | 0 (0.0)      | 11 (0.8)   | 27 (0.9)   | 84 (1.5)    | 184 (2.7)   | 363 (3.7)   | 539 (5.1)   | 179 (5.9)  |
| Endocarditis / Myocarditis<br>Pericarditis | 181 (0.4)       | 1 (0.2)      | 12 (0.9)   | 19 (0.6)   | 29 (0.5)    | 44 (0.6)    | 39 (0.4)    | 36 (0.3)    | 1 (0.0)    |
| Myocarditis / Pericarditis                 | 121 (0.3)       | 1 (0.2)      | 3 (0.2)    | 20 (0.7)   | 19 (0.3)    | 22 (0.3)    | 28 (0.3)    | 22 (0.2)    | 6 (0.2)    |
| Cardiomyopathy                             | 94 (0.2)        | 0 (0.0)      | 3 (0.2)    | 9 (0.3)    | 13 (0.2)    | 20 (0.3)    | 24 (0.2)    | 21 (0.2)    | 4 (0.1)    |
| Cardiac arrhythmia                         | 2933<br>(7.1)   | 20 (3.3)     | 48 (3.5)   | 143 (4.7)  | 367 (6.6)   | 597 (8.7)   | 790 (8.0)   | 759 (7.1)   | 209 (6.9)  |
| Cardiac ischemia                           | 615 (1.5)       | 0 (0.0)      | 11 (0.8)   | 19 (0.6)   | 56 (1.0)    | 106 (1.5)   | 175 (1.8)   | 186 (1.7)   | 62 (2.0)   |
| Cardiac arrest                             | 1249<br>(3.0)   | 4 (0.7)      | 19 (1.4)   | 68 (2.3)   | 175 (3.1)   | 238 (3.5)   | 327 (3.3)   | 315 (3.0)   | 103 (3.4)  |
| Bloodstream infection                      | 710 (1.7)       | 9 (1.5)      | 29 (2.1)   | 65 (2.2)   | 99 (1.8)    | 142 (2.1)   | 154 (1.6)   | 166 (1.6)   | 46 (1.5)   |
| Coagulation disorder / DIC                 | 1343<br>(3.3)   | 13 (2.1)     | 56 (4.0)   | 131 (4.3)  | 258 (4.6)   | 272 (4.0)   | 292 (3.0)   | 253 (2.4)   | 68 (2.2)   |
| Anaemia                                    | 5762<br>(14.0)  | 39 (6.4)     | 143 (10.3) | 327 (10.8) | 791 (14.1)  | 1043 (15.2) | 1432 (14.6) | 1534 (14.4) | 453 (14.9) |
| Rhabdomyolysis / Myositis                  | 165 (0.4)       | 5 (0.8)      | 6 (0.4)    | 12 (0.4)   | 24 (0.4)    | 18 (0.3)    | 42 (0.4)    | 41 (0.4)    | 17 (0.6)   |
| Acute Kidney Injury                        | 11097<br>(27.0) | 75<br>(12.3) | 228 (16.5) | 620 (20.5) | 1434 (25.6) | 2116 (30.7) | 2775 (28.2) | 3007 (28.2) | 842 (27.8) |
| Gastrointestinal haemorrhage               | 529 (1.3)       | 5 (0.8)      | 9 (0.6)    | 32 (1.1)   | 65 (1.2)    | 91 (1.3)    | 120 (1.2)   | 159 (1.5)   | 48 (1.6)   |
| Pancreatitis                               | 139 (0.3)       | 6 (1.0)      | 18 (1.3)   | 18 (0.6)   | 36 (0.6)    | 21 (0.3)    | 23 (0.2)    | 14 (0.1)    | 3 (0.1)    |
| Deep Vein Thrombosis                       | 261 (0.6)       | 1 (0.2)      | 7 (0.5)    | 25 (0.8)   | 59 (1.1)    | 55 (0.8)    | 57 (0.6)    | 44 (0.4)    | 13 (0.4)   |
| Pulmonary Embolism                         | 622 (1.5)       | 11 (1.8)     | 14 (1.0)   | 78 (2.6)   | 139 (2.5)   | 136 (2.0)   | 135 (1.4)   | 96 (0.9)    | 13 (0.4)   |
| Liver Injury                               | 4732<br>(11.5)  | 80<br>(13.1) | 223 (16.1) | 515 (17.0) | 988 (17.7)  | 1027 (14.9) | 998 (10.1)  | 714 (6.7)   | 187 (6.2)  |

72  
73  
74  
75

Percentage values are row percentages, except for totals which represent column percentages. ARDS – Acute Respiratory Distress Syndrome, DIC – Disseminated Intravascular Coagulation.



76 **Supplementary table 3B – Comparison between suspected and highly likely bacterial**  
 77 **pneumonia by age and sex in adults admitted to hospital with severe COVID-19.**

78

|        |                                   | Age group (years) |           |            |            |             |             |             |              |             |
|--------|-----------------------------------|-------------------|-----------|------------|------------|-------------|-------------|-------------|--------------|-------------|
|        |                                   | Total N           | 19-29     | 30-39      | 40-49      | 50-59       | 60-69       | 70-79       | 80-89        | 90+         |
| Female | Total N (%)                       | 31977             | 882 (2.8) | 1359 (4.2) | 1960 (6.1) | 3488 (10.9) | 4231 (13.2) | 6685 (20.9) | 9178 (28.7)  | 4194 (13.1) |
|        | Suspected Bacterial Pneumonia     | 3533 (100)        | 43 (1.2)  | 101 (2.9)  | 188 (5.3)  | 403 (11.4)  | 539 (15.3)  | 771 (21.8)  | 1028 (29.1)  | 460 (13.0)  |
|        | Highly likely Bacterial Pneumonia | 99 (100)          | 2 (2.0)   | 4 (4.0)    | 14 (14.1)  | 25 (25.3)   | 21 (21.2)   | 21 (21.2)   | 10 (10.1)    | 2 (2.0)     |
| Male   | Total N (%)                       | 41025             | 612 (1.5) | 1385 (3.4) | 3021 (7.4) | 5591 (13.6) | 6882 (16.8) | 9841 (24.0) | 10662 (26.0) | 3031 (7.4)  |
|        | Suspected Bacterial Pneumonia     | 5321 (100)        | 52 (1.0)  | 148 (2.8)  | 407 (7.6)  | 765 (14.4)  | 927 (17.4)  | 1281 (24.1) | 1353 (25.4)  | 388 (7.3)   |
|        | Highly likely Bacterial Pneumonia | 260 (100)         | 1 (0.4)   | 10 (3.8)   | 38 (14.6)  | 78 (30.0)   | 60 (23.1)   | 54 (20.8)   | 17 (6.5)     | 2 (0.8)     |

79

80 Percentage values are row percentages

81 **Supplementary table 3C- Comparison between suspected and highly likely bacterial**  
 82 **pneumonia by number of existing comorbidities in adults admitted to hospital with**  
 83 **severe COVID-19.**

84

| Number of existing comorbidities on admission |                                   | Total N | Age group (years) |             |             |             |             |              |              |             |
|-----------------------------------------------|-----------------------------------|---------|-------------------|-------------|-------------|-------------|-------------|--------------|--------------|-------------|
|                                               |                                   |         | 19-29             | 30-39       | 40-49       | 50-59       | 60-69       | 70-79        | 80-89        | 90+         |
| 0                                             | Total N (%)                       | 13908   | 862 (6.2)         | 1430 (10.3) | 2140 (15.4) | 2907 (20.9) | 2341 (16.8) | 1925 (13.8)  | 1700 (12.2)  | 603 (4.3)   |
|                                               | Suspected Bacterial Pneumonia     | 1478    | 44 (3.0)          | 112 (7.6)   | 239 (16.2)  | 356 (24.1)  | 312 (21.1)  | 211 (14.3)   | 154 (10.4)   | 50 (3.4)    |
|                                               | Highly likely Bacterial Pneumonia | 111     | 1 (0.9)           | 6 (5.4)     | 23 (20.7)   | 39 (35.1)   | 21 (18.9)   | 19 (17.1)    | 2 (1.8)      | 0 (0.0)     |
| 1                                             | Total N (%)                       | 17635   | 434 (2.5)         | 780 (4.4)   | 1550 (8.8)  | 2850 (16.2) | 3031 (17.2) | 3786 (21.5)  | 3768 (21.4)  | 1436 (8.1)  |
|                                               | Suspected Bacterial Pneumonia     | 2105    | 33 (1.6)          | 76 (3.6)    | 199 (9.5)   | 369 (17.5)  | 390 (18.5)  | 458 (21.8)   | 425 (20.2)   | 155 (7.4)   |
|                                               | Highly likely Bacterial Pneumonia | 107     | 1 (0.9)           | 5 (4.7)     | 14 (13.1)   | 40 (37.4)   | 23 (21.5)   | 19 (17.8)    | 4 (3.7)      | 1 (0.9)     |
| 2+                                            | Total N (%)                       | 41654   | 204 (0.5)         | 543 (1.3)   | 1306 (3.1)  | 3344 (8.0)  | 5767 (13.8) | 10852 (26.1) | 14432 (34.6) | 5206 (12.5) |
|                                               | Suspected Bacterial Pneumonia     | 5288    | 18 (0.3)          | 62 (1.2)    | 160 (3.0)   | 445 (8.4)   | 766 (14.5)  | 1389 (26.3)  | 1805 (34.1)  | 643 (12.2)  |
|                                               | Highly likely Bacterial Pneumonia | 141     | 1 (0.7)           | 3 (2.1)     | 15 (10.6)   | 24 (17.0)   | 37 (26.2)   | 37 (26.2)    | 21 (14.9)    | 3 (2.1)     |

85

86 Percentage values are row percentages

87 **Supplementary table 4 - Organ specific complications stratified by age and presence of**  
88 **comorbidity in adults admitted to hospital with severe COVID-19 in adults admitted to**  
89 **hospital with severe COVID-19.**

90

| Number of existing comorbidities on admission |                  | Total        | Age group (years) |             |             |             |             |             |              |              |
|-----------------------------------------------|------------------|--------------|-------------------|-------------|-------------|-------------|-------------|-------------|--------------|--------------|
|                                               |                  |              | 19-29             | 30-39       | 40-49       | 50-59       | 60-69       | 70-79       | 80-89        | 90+          |
| 0                                             | Total N (%)      | 13908        | 862 (6.2)         | 1430 (10.3) | 2140 (15.4) | 2907 (20.9) | 2341 (16.8) | 1925 (13.8) | 1700 (12.2)  | 603 (4.3)    |
|                                               | Systemic         | 1614 (11.6)  | 61 (7.1)          | 153 (10.7)  | 245 (11.4)  | 368 (12.7)  | 334 (14.3)  | 233 (12.1)  | 159 (9.4)    | 61 (10.1)    |
|                                               | Renal            | 2170 (15.6)  | 45 (5.2)          | 122 (8.5)   | 273 (12.8)  | 497 (17.1)  | 497 (21.2)  | 365 (19.0)  | 281 (16.5)   | 90 (14.9)    |
|                                               | Gastrointestinal | 1657 (11.9)  | 64 (7.4)          | 162 (11.3)  | 299 (14.0)  | 459 (15.8)  | 320 (13.7)  | 210 (10.9)  | 111 (6.5)    | 32 (5.3)     |
|                                               | Cardiovascular   | 1046 (7.5)   | 21 (2.4)          | 46 (3.2)    | 134 (6.3)   | 212 (7.3)   | 219 (9.4)   | 199 (10.3)  | 162 (9.5)    | 53 (8.8)     |
|                                               | Neurological     | 409 (2.9)    | 12 (1.4)          | 35 (2.4)    | 52 (2.4)    | 75 (2.6)    | 78 (3.3)    | 65 (3.4)    | 79 (4.6)     | 13 (2.2)     |
|                                               | Respiratory      | 2562 (18.4)  | 61 (7.1)          | 185 (12.9)  | 462 (21.6)  | 676 (23.3)  | 596 (25.5)  | 372 (19.3)  | 164 (9.6)    | 46 (7.6)     |
|                                               | Any complication | 5328 (38.3)  | 184 (21.3)        | 427 (29.9)  | 816 (38.1)  | 1184 (40.7) | 1059 (45.2) | 811 (42.1)  | 650 (38.2)   | 197 (32.7)   |
|                                               | 1                | Total N (%)  | 17635             | 434 (2.5)   | 780 (4.4)   | 1550 (8.8)  | 2850 (16.2) | 3031 (17.2) | 3786 (21.5)  | 3768 (21.4)  |
| Systemic                                      |                  | 2495 (14.1)  | 49 (11.3)         | 113 (14.5)  | 218 (14.1)  | 439 (15.4)  | 516 (17.0)  | 508 (13.4)  | 468 (12.4)   | 184 (12.8)   |
| Renal                                         |                  | 3747 (21.2)  | 42 (9.7)          | 105 (13.5)  | 261 (16.8)  | 603 (21.2)  | 796 (26.3)  | 867 (22.9)  | 795 (21.1)   | 278 (19.4)   |
| Gastrointestinal                              |                  | 2021 (11.5)  | 50 (11.5)         | 112 (14.4)  | 235 (15.2)  | 450 (15.8)  | 454 (15.0)  | 380 (10.0)  | 244 (6.5)    | 96 (6.7)     |
| Cardiovascular                                |                  | 1801 (10.2)  | 14 (3.2)          | 52 (6.7)    | 103 (6.6)   | 255 (8.9)   | 353 (11.6)  | 427 (11.3)  | 417 (11.1)   | 180 (12.5)   |
| Neurological                                  |                  | 693 (3.9)    | 17 (3.9)          | 27 (3.5)    | 52 (3.4)    | 105 (3.7)   | 141 (4.7)   | 145 (3.8)   | 155 (4.1)    | 51 (3.6)     |
| Respiratory                                   |                  | 3416 (19.4)  | 55 (12.7)         | 155 (19.9)  | 331 (21.4)  | 716 (25.1)  | 797 (26.3)  | 707 (18.7)  | 488 (13.0)   | 167 (11.6)   |
| Any complication                              |                  | 8198 (46.5)  | 142 (32.7)        | 316 (40.5)  | 653 (42.1)  | 1334 (46.8) | 1555 (51.3) | 1814 (47.9) | 1730 (45.9)  | 654 (45.5)   |
| 2+                                            |                  | Total N (%)  | 41654             | 204 (0.5)   | 543 (1.3)   | 1306 (3.1)  | 3344 (8.0)  | 5767 (13.8) | 10852 (26.1) | 14432 (34.6) |
|                                               | Systemic         | 7786 (18.7)  | 37 (18.1)         | 110 (20.3)  | 268 (20.5)  | 697 (20.8)  | 1158 (20.1) | 1986 (18.3) | 2614 (18.1)  | 916 (17.6)   |
|                                               | Renal            | 11835 (28.4) | 39 (19.1)         | 126 (23.2)  | 340 (26.0)  | 978 (29.2)  | 1762 (30.6) | 3086 (28.4) | 4085 (28.3)  | 1419 (27.3)  |
|                                               | Gastrointestinal | 4223 (10.1)  | 25 (12.3)         | 91 (16.8)   | 206 (15.8)  | 559 (16.7)  | 804 (13.9)  | 1054 (9.7)  | 1123 (7.8)   | 361 (6.9)    |
|                                               | Cardiovascular   | 6126 (14.7)  | 12 (5.9)          | 36 (6.6)    | 133 (10.2)  | 380 (11.4)  | 817 (14.2)  | 1594 (14.7) | 2309 (16.0)  | 845 (16.2)   |
|                                               | Neurological     | 2013 (4.8)   | 9 (4.4)           | 29 (5.3)    | 58 (4.4)    | 172 (5.1)   | 281 (4.9)   | 515 (4.7)   | 707 (4.9)    | 242 (4.6)    |
|                                               | Respiratory      | 7508 (18.0)  | 29 (14.2)         | 117 (21.5)  | 376 (28.8)  | 871 (26.0)  | 1374 (23.8) | 1899 (17.5) | 2109 (14.6)  | 733 (14.1)   |
|                                               | Any complication | 22841 (54.8) | 85 (41.7)         | 272 (50.1)  | 701 (53.7)  | 1900 (56.8) | 3340 (57.9) | 5924 (54.6) | 7827 (54.2)  | 2792 (53.6)  |

91 Percentage values are row percentages, except for totals which represent column percentages

92

93 **Supplementary table 5 - Specific complications stratified by age and presence of**  
94 **comorbidity in adults admitted to hospital with severe COVID-19.**

| Number of existing comorbidities on admission |                                   | Total       | Age group (years) |             |             |             |             |             |             |            |
|-----------------------------------------------|-----------------------------------|-------------|-------------------|-------------|-------------|-------------|-------------|-------------|-------------|------------|
|                                               |                                   |             | 19-29             | 30-39       | 40-49       | 50-59       | 60-69       | 70-79       | 80-89       | 90+        |
| 0                                             | Total N (%)                       | 13908       | 862 (6.2)         | 1430 (10.3) | 2140 (15.4) | 2907 (20.9) | 2341 (16.8) | 1925 (13.8) | 1700 (12.2) | 603 (4.3)  |
|                                               | Empyema                           | 12 (0.1)    | 0 (0.0)           | 1 (0.1)     | 2 (0.1)     | 2 (0.1)     | 4 (0.2)     | 2 (0.1)     | 1 (0.1)     | 0 (0.0)    |
|                                               | Likely ARDS                       | 2167 (15.6) | 44 (5.1)          | 156 (10.9)  | 405 (18.9)  | 593 (20.4)  | 525 (22.4)  | 310 (16.1)  | 113 (6.6)   | 21 (3.5)   |
|                                               | Pneumothorax                      | 173 (1.2)   | 9 (1.0)           | 14 (1.0)    | 30 (1.4)    | 51 (1.8)    | 44 (1.9)    | 21 (1.1)    | 2 (0.1)     | 2 (0.3)    |
|                                               | Pleural effusion                  | 566 (4.1)   | 21 (2.4)          | 41 (2.9)    | 89 (4.2)    | 122 (4.2)   | 120 (5.1)   | 93 (4.8)    | 56 (3.3)    | 24 (4.0)   |
|                                               | Highly likely Bacterial Pneumonia | 111 (0.8)   | 1 (0.1)           | 6 (0.4)     | 23 (1.1)    | 39 (1.3)    | 21 (0.9)    | 19 (1.0)    | 2 (0.1)     | 0 (0.0)    |
|                                               | Meningitis / Encephalitis         | 41 (0.3)    | 5 (0.6)           | 6 (0.4)     | 6 (0.3)     | 6 (0.2)     | 9 (0.4)     | 4 (0.2)     | 4 (0.2)     | 1 (0.2)    |
|                                               | Seizure                           | 106 (0.8)   | 6 (0.7)           | 18 (1.3)    | 18 (0.8)    | 24 (0.8)    | 14 (0.6)    | 12 (0.6)    | 13 (0.8)    | 1 (0.2)    |
|                                               | Stroke / Cerebrovascular accident | 189 (1.4)   | 0 (0.0)           | 7 (0.5)     | 18 (0.8)    | 28 (1.0)    | 42 (1.8)    | 43 (2.2)    | 45 (2.6)    | 6 (1.0)    |
|                                               | Other neurological complication   | 117 (0.8)   | 2 (0.2)           | 7 (0.5)     | 17 (0.8)    | 25 (0.9)    | 26 (1.1)    | 13 (0.7)    | 21 (1.2)    | 6 (1.0)    |
|                                               | Congestive heart failure          | 111 (0.8)   | 0 (0.0)           | 5 (0.3)     | 7 (0.3)     | 16 (0.6)    | 16 (0.7)    | 23 (1.2)    | 27 (1.6)    | 17 (2.8)   |
|                                               | Endocarditis / Myocarditis        | 52 (0.4)    | 0 (0.0)           | 7 (0.5)     | 10 (0.5)    | 8 (0.3)     | 17 (0.7)    | 6 (0.3)     | 3 (0.2)     | 1 (0.2)    |
|                                               | Pericarditis                      | 41 (0.3)    | 2 (0.2)           | 3 (0.2)     | 11 (0.5)    | 13 (0.4)    | 7 (0.3)     | 2 (0.1)     | 3 (0.2)     | 0 (0.0)    |
|                                               | Myocarditis / Pericarditis        | 16 (0.1)    | 0 (0.0)           | 2 (0.1)     | 3 (0.1)     | 3 (0.1)     | 5 (0.2)     | 1 (0.1)     | 2 (0.1)     | 0 (0.0)    |
|                                               | Cardiomyopathy                    | 672 (4.8)   | 15 (1.7)          | 28 (2.0)    | 90 (4.2)    | 138 (4.7)   | 157 (6.7)   | 130 (6.8)   | 86 (5.1)    | 28 (4.6)   |
|                                               | Cardiac arrhythmia                | 84 (0.6)    | 0 (0.0)           | 8 (0.6)     | 7 (0.3)     | 13 (0.4)    | 14 (0.6)    | 16 (0.8)    | 21 (1.2)    | 5 (0.8)    |
|                                               | Cardiac ischaemia                 | 269 (1.9)   | 7 (0.8)           | 6 (0.4)     | 35 (1.6)    | 54 (1.9)    | 50 (2.1)    | 63 (3.3)    | 44 (2.6)    | 10 (1.7)   |
|                                               | Cardiac arrest                    | 193 (1.4)   | 3 (0.3)           | 20 (1.4)    | 36 (1.7)    | 38 (1.3)    | 43 (1.8)    | 26 (1.4)    | 20 (1.2)    | 7 (1.2)    |
|                                               | Bloodstream Infection             | 383 (2.8)   | 10 (1.2)          | 40 (2.8)    | 71 (3.3)    | 92 (3.2)    | 79 (3.4)    | 55 (2.9)    | 27 (1.6)    | 9 (1.5)    |
|                                               | Coagulation disorder / DIC        | 1253 (9.0)  | 53 (6.1)          | 114 (8.0)   | 180 (8.4)   | 288 (9.9)   | 262 (11.2)  | 191 (9.9)   | 116 (6.8)   | 49 (8.1)   |
|                                               | Anaemia                           | 45 (0.3)    | 2 (0.2)           | 3 (0.2)     | 8 (0.4)     | 9 (0.3)     | 4 (0.2)     | 8 (0.4)     | 6 (0.4)     | 5 (0.8)    |
|                                               | Rhabdomyolysis / Myositis         | 2170 (15.6) | 45 (5.2)          | 122 (8.5)   | 273 (12.8)  | 497 (17.1)  | 497 (21.2)  | 365 (19.0)  | 281 (16.5)  | 90 (14.9)  |
|                                               | Acute Kidney Injury               | 87 (0.6)    | 6 (0.7)           | 5 (0.3)     | 7 (0.3)     | 21 (0.7)    | 21 (0.9)    | 8 (0.4)     | 14 (0.8)    | 5 (0.8)    |
|                                               | Gastrointestinal haemorrhage      | 43 (0.3)    | 5 (0.6)           | 10 (0.7)    | 4 (0.2)     | 11 (0.4)    | 5 (0.2)     | 5 (0.3)     | 1 (0.1)     | 2 (0.3)    |
|                                               | Pancreatitis                      | 99 (0.7)    | 2 (0.2)           | 8 (0.6)     | 15 (0.7)    | 31 (1.1)    | 25 (1.1)    | 10 (0.5)    | 6 (0.4)     | 2 (0.3)    |
|                                               | Deep Vein Thrombosis              | 257 (1.8)   | 5 (0.6)           | 19 (1.3)    | 48 (2.2)    | 78 (2.7)    | 54 (2.3)    | 32 (1.7)    | 19 (1.1)    | 2 (0.3)    |
|                                               | Pulmonary Embolism                | 1566 (11.3) | 58 (6.7)          | 150 (10.5)  | 293 (13.7)  | 440 (15.1)  | 302 (12.9)  | 201 (10.4)  | 97 (5.7)    | 25 (4.1)   |
|                                               | Liver Injury                      |             |                   |             |             |             |             |             |             |            |
| 1                                             | Total N (%)                       | 17635       | 434 (2.5)         | 780 (4.4)   | 1550 (8.8)  | 2850 (16.2) | 3031 (17.2) | 3786 (21.5) | 3768 (21.4) | 1436 (8.1) |
|                                               | Empyema                           | 23 (0.1)    | 0 (0.0)           | 3 (0.4)     | 2 (0.1)     | 3 (0.1)     | 6 (0.2)     | 3 (0.1)     | 3 (0.1)     | 3 (0.2)    |
|                                               | Likely ARDS                       | 2653 (15.0) | 49 (11.3)         | 132 (16.9)  | 293 (18.9)  | 627 (22.0)  | 677 (22.3)  | 526 (13.9)  | 275 (7.3)   | 74 (5.2)   |

| Number of existing comorbidities on admission | Total       | Age group (years) |            |            |            |             |              |              |             |
|-----------------------------------------------|-------------|-------------------|------------|------------|------------|-------------|--------------|--------------|-------------|
|                                               |             | 19-29             | 30-39      | 40-49      | 50-59      | 60-69       | 70-79        | 80-89        | 90+         |
| Pneumothorax                                  | 208 (1.2)   | 2 (0.5)           | 8 (1.0)    | 22 (1.4)   | 55 (1.9)   | 59 (1.9)    | 41 (1.1)     | 16 (0.4)     | 5 (0.3)     |
| Pleural effusion                              | 959 (5.4)   | 10 (2.3)          | 34 (4.4)   | 56 (3.6)   | 129 (4.5)  | 187 (6.2)   | 217 (5.7)    | 226 (6.0)    | 100 (7.0)   |
| Highly likely Bacterial Pneumonia             | 107 (0.6)   | 1 (0.2)           | 5 (0.6)    | 14 (0.9)   | 40 (1.4)   | 23 (0.8)    | 19 (0.5)     | 4 (0.1)      | 1 (0.1)     |
| Meningitis / Encephalitis                     | 33 (0.2)    | 1 (0.2)           | 3 (0.4)    | 3 (0.2)    | 6 (0.2)    | 10 (0.3)    | 7 (0.2)      | 3 (0.1)      | 0 (0.0)     |
| Seizure                                       | 178 (1.0)   | 7 (1.6)           | 16 (2.1)   | 26 (1.7)   | 34 (1.2)   | 36 (1.2)    | 20 (0.5)     | 29 (0.8)     | 10 (0.7)    |
| Stroke / Cerebrovascular accident             | 293 (1.7)   | 2 (0.5)           | 3 (0.4)    | 16 (1.0)   | 33 (1.2)   | 55 (1.8)    | 81 (2.1)     | 76 (2.0)     | 27 (1.9)    |
| Other neurological complication               | 262 (1.5)   | 9 (2.1)           | 11 (1.4)   | 17 (1.1)   | 44 (1.5)   | 51 (1.7)    | 53 (1.4)     | 61 (1.6)     | 16 (1.1)    |
| Congestive heart failure                      | 316 (1.8)   | 0 (0.0)           | 5 (0.6)    | 9 (0.6)    | 24 (0.8)   | 47 (1.6)    | 78 (2.1)     | 90 (2.4)     | 63 (4.4)    |
| Endocarditis / Myocarditis                    | 70 (0.4)    | 0 (0.0)           | 8 (1.0)    | 6 (0.4)    | 14 (0.5)   | 19 (0.6)    | 13 (0.3)     | 8 (0.2)      | 2 (0.1)     |
| Pericarditis                                  | 53 (0.3)    | 1 (0.2)           | 2 (0.3)    | 8 (0.5)    | 8 (0.3)    | 12 (0.4)    | 13 (0.3)     | 7 (0.2)      | 2 (0.1)     |
| Myocarditis / Pericarditis                    | 34 (0.2)    | 0 (0.0)           | 1 (0.1)    | 5 (0.3)    | 8 (0.3)    | 5 (0.2)     | 8 (0.2)      | 6 (0.2)      | 1 (0.1)     |
| Cardiomyopathy                                | 1082 (6.1)  | 12 (2.8)          | 28 (3.6)   | 66 (4.3)   | 159 (5.6)  | 229 (7.6)   | 268 (7.1)    | 231 (6.1)    | 89 (6.2)    |
| Cardiac arrhythmia                            | 176 (1.0)   | 0 (0.0)           | 5 (0.6)    | 7 (0.5)    | 23 (0.8)   | 37 (1.2)    | 45 (1.2)     | 43 (1.1)     | 16 (1.1)    |
| Cardiac ischaemia                             | 461 (2.6)   | 1 (0.2)           | 16 (2.1)   | 27 (1.7)   | 87 (3.1)   | 96 (3.2)    | 98 (2.6)     | 95 (2.5)     | 41 (2.9)    |
| Cardiac arrest                                | 296 (1.7)   | 9 (2.1)           | 19 (2.4)   | 34 (2.2)   | 58 (2.0)   | 61 (2.0)    | 53 (1.4)     | 48 (1.3)     | 14 (1.0)    |
| Bloodstream Infection                         | 489 (2.8)   | 12 (2.8)          | 22 (2.8)   | 51 (3.3)   | 106 (3.7)  | 126 (4.2)   | 96 (2.5)     | 56 (1.5)     | 20 (1.4)    |
| Coagulation disorder / DIC                    | 2012 (11.4) | 34 (7.8)          | 92 (11.8)  | 173 (11.2) | 351 (12.3) | 419 (13.8)  | 407 (10.8)   | 380 (10.1)   | 156 (10.9)  |
| Anaemia                                       | 54 (0.3)    | 4 (0.9)           | 1 (0.1)    | 4 (0.3)    | 9 (0.3)    | 7 (0.2)     | 14 (0.4)     | 13 (0.3)     | 2 (0.1)     |
| Rhabdomyolysis / Myositis                     | 3747 (21.2) | 42 (9.7)          | 105 (13.5) | 261 (16.8) | 603 (21.2) | 796 (26.3)  | 867 (22.9)   | 795 (21.1)   | 278 (19.4)  |
| Acute Kidney Injury                           | 187 (1.1)   | 2 (0.5)           | 4 (0.5)    | 21 (1.4)   | 29 (1.0)   | 38 (1.3)    | 29 (0.8)     | 41 (1.1)     | 23 (1.6)    |
| Gastrointestinal haemorrhage                  | 67 (0.4)    | 3 (0.7)           | 7 (0.9)    | 10 (0.6)   | 17 (0.6)   | 14 (0.5)    | 8 (0.2)      | 7 (0.2)      | 1 (0.1)     |
| Pancreatitis                                  | 102 (0.6)   | 0 (0.0)           | 2 (0.3)    | 14 (0.9)   | 19 (0.7)   | 26 (0.9)    | 26 (0.7)     | 13 (0.3)     | 2 (0.1)     |
| Deep Vein Thrombosis                          | 261 (1.5)   | 6 (1.4)           | 6 (0.8)    | 31 (2.0)   | 50 (1.8)   | 64 (2.1)    | 51 (1.3)     | 47 (1.2)     | 6 (0.4)     |
| Pulmonary Embolism                            | 1859 (10.5) | 48 (11.1)         | 105 (13.5) | 220 (14.2) | 430 (15.1) | 425 (14.0)  | 351 (9.3)    | 205 (5.4)    | 75 (5.2)    |
| Liver Injury                                  | 2+          | 204 (0.5)         | 543 (1.3)  | 1306 (3.1) | 3344 (8.0) | 5767 (13.8) | 10852 (26.1) | 14432 (34.6) | 5206 (12.5) |
| Total N (%)                                   | 41654       |                   |            |            |            |             |              |              |             |
| Empyema                                       | 57 (0.1)    | 0 (0.0)           | 0 (0.0)    | 2 (0.2)    | 8 (0.2)    | 10 (0.2)    | 11 (0.1)     | 18 (0.1)     | 8 (0.2)     |
| Likely ARDS                                   | 4871 (11.7) | 23 (11.3)         | 106 (19.5) | 314 (24.0) | 709 (21.2) | 1043 (18.1) | 1243 (11.5)  | 1108 (7.7)   | 325 (6.2)   |
| Pneumothorax                                  | 313 (0.8)   | 1 (0.5)           | 9 (1.7)    | 21 (1.6)   | 46 (1.4)   | 75 (1.3)    | 77 (0.7)     | 65 (0.5)     | 19 (0.4)    |
| Pleural effusion                              | 3006 (7.2)  | 8 (3.9)           | 25 (4.6)   | 85 (6.5)   | 214 (6.4)  | 416 (7.2)   | 743 (6.8)    | 1085 (7.5)   | 430 (8.3)   |
| Highly likely Bacterial Pneumonia             | 141 (0.3)   | 1 (0.5)           | 3 (0.6)    | 15 (1.1)   | 24 (0.7)   | 37 (0.6)    | 37 (0.3)     | 21 (0.1)     | 3 (0.1)     |
| Meningitis / Encephalitis                     | 82 (0.2)    | 1 (0.5)           | 0 (0.0)    | 12 (0.9)   | 15 (0.4)   | 23 (0.4)    | 9 (0.1)      | 20 (0.1)     | 2 (0.0)     |
| Seizure                                       | 545 (1.3)   | 6 (2.9)           | 16 (2.9)   | 24 (1.8)   | 77 (2.3)   | 83 (1.4)    | 152 (1.4)    | 150 (1.0)    | 37 (0.7)    |

| Number of existing comorbidities on admission | Total        | Age group (years) |            |            |            |             |             |             |             |
|-----------------------------------------------|--------------|-------------------|------------|------------|------------|-------------|-------------|-------------|-------------|
|                                               |              | 19-29             | 30-39      | 40-49      | 50-59      | 60-69       | 70-79       | 80-89       | 90+         |
| Stroke / Cerebrovascular accident             | 731 (1.8)    | 1 (0.5)           | 7 (1.3)    | 16 (1.2)   | 46 (1.4)   | 117 (2.0)   | 187 (1.7)   | 264 (1.8)   | 93 (1.8)    |
| Other neurological complication               | 856 (2.1)    | 4 (2.0)           | 8 (1.5)    | 19 (1.5)   | 63 (1.9)   | 90 (1.6)    | 214 (2.0)   | 331 (2.3)   | 127 (2.4)   |
| Congestive heart failure                      | 2101 (5.0)   | 0 (0.0)           | 6 (1.1)    | 27 (2.1)   | 78 (2.3)   | 214 (3.7)   | 506 (4.7)   | 914 (6.3)   | 356 (6.8)   |
| Endocarditis / Myocarditis                    | 142 (0.3)    | 2 (1.0)           | 2 (0.4)    | 9 (0.7)    | 18 (0.5)   | 27 (0.5)    | 43 (0.4)    | 39 (0.3)    | 2 (0.0)     |
| Pericarditis                                  | 97 (0.2)     | 1 (0.5)           | 2 (0.4)    | 6 (0.5)    | 11 (0.3)   | 19 (0.3)    | 26 (0.2)    | 22 (0.2)    | 10 (0.2)    |
| Myocarditis / Pericarditis                    | 124 (0.3)    | 0 (0.0)           | 2 (0.4)    | 7 (0.5)    | 12 (0.4)   | 18 (0.3)    | 31 (0.3)    | 42 (0.3)    | 12 (0.2)    |
| Cardiomyopathy                                | 3098 (7.4)   | 8 (3.9)           | 22 (4.1)   | 74 (5.7)   | 210 (6.3)  | 438 (7.6)   | 824 (7.6)   | 1129 (7.8)  | 393 (7.5)   |
| Cardiac arrhythmia                            | 738 (1.8)    | 0 (0.0)           | 1 (0.2)    | 11 (0.8)   | 49 (1.5)   | 97 (1.7)    | 204 (1.9)   | 261 (1.8)   | 115 (2.2)   |
| Cardiac ischaemia                             | 1173 (2.8)   | 1 (0.5)           | 10 (1.8)   | 31 (2.4)   | 99 (3.0)   | 185 (3.2)   | 327 (3.0)   | 377 (2.6)   | 143 (2.7)   |
| Cardiac arrest                                | 626 (1.5)    | 3 (1.5)           | 12 (2.2)   | 30 (2.3)   | 51 (1.5)   | 109 (1.9)   | 151 (1.4)   | 203 (1.4)   | 67 (1.3)    |
| Bloodstream Infection                         | 1199 (2.9)   | 5 (2.5)           | 19 (3.5)   | 55 (4.2)   | 161 (4.8)  | 202 (3.5)   | 288 (2.7)   | 362 (2.5)   | 107 (2.1)   |
| Coagulation disorder / DIC                    | 6641 (15.9)  | 33 (16.2)         | 97 (17.9)  | 226 (17.3) | 586 (17.5) | 991 (17.2)  | 1693 (15.6) | 2232 (15.5) | 783 (15.0)  |
| Anaemia                                       | 167 (0.4)    | 2 (1.0)           | 3 (0.6)    | 2 (0.2)    | 15 (0.4)   | 18 (0.3)    | 35 (0.3)    | 59 (0.4)    | 33 (0.6)    |
| Rhabdomyolysis / Myositis                     | 11835 (28.4) | 39 (19.1)         | 126 (23.2) | 340 (26.0) | 978 (29.2) | 1762 (30.6) | 3086 (28.4) | 4085 (28.3) | 1419 (27.3) |
| Acute Kidney Injury                           | 581 (1.4)    | 2 (1.0)           | 8 (1.5)    | 12 (0.9)   | 40 (1.2)   | 80 (1.4)    | 141 (1.3)   | 224 (1.6)   | 74 (1.4)    |
| Gastrointestinal haemorrhage                  | 138 (0.3)    | 3 (1.5)           | 10 (1.8)   | 13 (1.0)   | 25 (0.7)   | 26 (0.5)    | 26 (0.2)    | 29 (0.2)    | 6 (0.1)     |
| Pancreatitis                                  | 228 (0.5)    | 1 (0.5)           | 7 (1.3)    | 5 (0.4)    | 40 (1.2)   | 37 (0.6)    | 52 (0.5)    | 66 (0.5)    | 20 (0.4)    |
| Deep Vein Thrombosis                          | 486 (1.2)    | 3 (1.5)           | 4 (0.7)    | 26 (2.0)   | 76 (2.3)   | 101 (1.8)   | 130 (1.2)   | 120 (0.8)   | 26 (0.5)    |
| Pulmonary Embolism                            | 3683 (8.8)   | 22 (10.8)         | 81 (14.9)  | 194 (14.9) | 530 (15.8) | 733 (12.7)  | 922 (8.5)   | 915 (6.3)   | 286 (5.5)   |
| Liver Injury                                  |              |                   |            |            |            |             |             |             |             |

95  
96  
97  
98  
99

Percentage values are row percentages, except for totals which represent column percentages. ARDS – Acute Respiratory Distress Syndrome, DIC – Disseminated Intravascular Coagulation.

100 **Supplementary table 6 - Outcomes by organ specific complications in adults admitted to**  
 101 **hospital with severe COVID-19 who survived.**

102

|                              |           | Total number of patients experiencing complications |                  | Organ-specific level complications <sup>§</sup> |              |                  |                |              |             |
|------------------------------|-----------|-----------------------------------------------------|------------------|-------------------------------------------------|--------------|------------------|----------------|--------------|-------------|
|                              |           | Total patients                                      | Any complication | Systemic                                        | Renal        | Gastrointestinal | Cardiovascular | Neurological | Respiratory |
| Total N (%)                  |           | 50105                                               | 21784 (43.5)     | 7423 (14.8)                                     | 10059 (20.1) | 4837 (9.7)       | 4035 (8.1)     | 1880 (3.8)   | 7028 (14.0) |
| Critical Care Admission      | No        | 43153 (86.1)                                        | 16853 (77.4)     | 5557 (74.9)                                     | 7467 (74.2)  | 3233 (66.8)      | 3020 (74.8)    | 1461 (77.7)  | 3616 (51.5) |
|                              | Yes       | 6242 (12.5)                                         | 4926 (22.6)      | 1866 (25.1)                                     | 2589 (25.7)  | 1602 (33.1)      | 1015 (25.2)    | 419 (22.3)   | 3410 (48.5) |
|                              | (Missing) | 710 (1.4)                                           | 5 (0.0)          | 0 (0.0)                                         | 3 (0.0)      | 2 (0.0)          | 0 (0.0)        | 0 (0.0)      | 2 (0.0)     |
| Any invasive ventilation     | No        | 45825 (91.5)                                        | 18630 (85.5)     | 6067 (81.7)                                     | 8271 (82.2)  | 3728 (77.1)      | 3275 (81.2)    | 1533 (81.5)  | 4498 (64.0) |
|                              | Yes       | 3472 (6.9)                                          | 3130 (14.4)      | 1352 (18.2)                                     | 1773 (17.6)  | 1104 (22.8)      | 758 (18.8)     | 347 (18.5)   | 2529 (36.0) |
|                              | (Missing) | 808 (1.6)                                           | 24 (0.1)         | 4 (0.1)                                         | 15 (0.1)     | 5 (0.1)          | 2 (0.0)        | 0 (0.0)      | 1 (0.0)     |
| Any non-invasive ventilation | No        | 42350 (87.2)                                        | 17255 (80.1)     | 5917 (80.3)                                     | 7738 (77.8)  | 3568 (74.6)      | 3184 (79.6)    | 1566 (84.3)  | 4232 (60.6) |
|                              | Yes       | 6206 (12.8)                                         | 4296 (19.9)      | 1454 (19.7)                                     | 2207 (22.2)  | 1218 (25.4)      | 817 (20.4)     | 291 (15.7)   | 2748 (39.4) |
| Any oxygen                   | No        | 15507 (31.8)                                        | 4892 (22.6)      | 1748 (23.7)                                     | 1942 (19.4)  | 940 (19.5)       | 888 (22.2)     | 580 (31.1)   | 627 (8.9)   |
|                              | Yes       | 33310 (68.2)                                        | 16760 (77.4)     | 5642 (76.3)                                     | 8061 (80.6)  | 3873 (80.5)      | 3120 (77.8)    | 1285 (68.9)  | 6379 (91.1) |

103

104

105

106

Percentage values are row percentages, except for totals which represent column percentages. § = Denominator is number of non-missing observations for each organ system.

107 **Supplementary table 7 - Outcomes by organ specific complications in adults admitted to**  
 108 **hospital with severe COVID-19 who died.**

|                              |           | Total number of patients experiencing complications |                  | Organ-specific level complications <sup>§</sup> |             |                  |                |              |             |
|------------------------------|-----------|-----------------------------------------------------|------------------|-------------------------------------------------|-------------|------------------|----------------|--------------|-------------|
|                              |           | Total                                               | Any complication | Systemic                                        | Renal       | Gastrointestinal | Cardiovascular | Neurological | Respiratory |
| Total N (%)                  |           | 23092                                               | 14583 (63.2)     | 4472 (19.4)                                     | 7693 (33.3) | 3064 (13.3)      | 4938 (21.4)    | 1235 (5.3)   | 6458 (28.0) |
| Critical Care Admission      | No        | 18972 (82.2)                                        | 11239 (77.1)     | 3247 (72.6)                                     | 5525 (71.8) | 1906 (62.2)      | 3620 (73.3)    | 985 (79.8)   | 3856 (59.7) |
|                              | Yes       | 3792 (16.4)                                         | 3341 (22.9)      | 1224 (27.4)                                     | 2166 (28.2) | 1158 (37.8)      | 1318 (26.7)    | 249 (20.2)   | 2602 (40.3) |
|                              | (Missing) | 328 (1.4)                                           | 3 (0.0)          | 1 (0.0)                                         | 2 (0.0)     | 0 (0.0)          | 0 (0.0)        | 1 (0.1)      | 0 (0.0)     |
| Any invasive ventilation     | No        | 20063 (86.9)                                        | 12080 (82.8)     | 3489 (78.0)                                     | 5991 (77.9) | 2087 (68.1)      | 3911 (79.2)    | 1040 (84.2)  | 4311 (66.8) |
|                              | Yes       | 2650 (11.5)                                         | 2489 (17.1)      | 978 (21.9)                                      | 1698 (22.1) | 973 (31.8)       | 1026 (20.8)    | 195 (15.8)   | 2141 (33.2) |
|                              | (Missing) | 379 (1.6)                                           | 14 (0.1)         | 5 (0.1)                                         | 4 (0.1)     | 4 (0.1)          | 1 (0.0)        | 0 (0.0)      | 6 (0.1)     |
| Any non-invasive ventilation | No        | 17685 (79.3)                                        | 10947 (76.1)     | 3311 (74.8)                                     | 5623 (73.9) | 2117 (70.0)      | 3678 (75.1)    | 1000 (81.8)  | 4100 (64.2) |
|                              | Yes       | 4621 (20.7)                                         | 3445 (23.9)      | 1113 (25.2)                                     | 1987 (26.1) | 906 (30.0)       | 1217 (24.9)    | 222 (18.2)   | 2290 (35.8) |
| Any oxygen                   | No        | 2145 (9.5)                                          | 1079 (7.4)       | 331 (7.4)                                       | 528 (6.9)   | 213 (7.0)        | 302 (6.1)      | 157 (12.8)   | 211 (3.3)   |
|                              | Yes       | 20385 (90.5)                                        | 13421 (92.6)     | 4120 (92.6)                                     | 7128 (93.1) | 2832 (93.0)      | 4624 (93.9)    | 1073 (87.2)  | 6219 (96.7) |

109  
 110 Percentage values are row percentages, except for totals which represent column percentages. § = Denominator is number of non-missing  
 111 observations for each organ system.  
 112



113 **Supplementary table 8 - Effect of complications on survival (adjusted Cox proportional**  
 114 **hazards models) for figure 2C**

115 *Supplementary table 8A - Any complication*

| Dependent:<br>Survival (mortality) |                    |               | HR (univariable)                | HR (multivariable)              |
|------------------------------------|--------------------|---------------|---------------------------------|---------------------------------|
| Any complication                   | No                 | 37839 (100.0) | -                               | -                               |
|                                    | Yes                | 36662 (100.0) | 1.91 (1.86-1.97,<br>p<0.001)    | 1.74 (1.64-1.84,<br>p<0.001)    |
| Age on admission                   | 19-29              | 1477 (100.0)  | -                               | -                               |
|                                    | 30-39              | 2707 (100.0)  | 1.82 (1.25-2.64,<br>p=0.002)    | 1.68 (1.22-2.31,<br>p=0.002)    |
|                                    | 40-49              | 4930 (100.0)  | 3.22 (2.29-4.53,<br>p<0.001)    | 2.78 (1.97-3.94,<br>p<0.001)    |
|                                    | 50-59              | 9003 (100.0)  | 6.24 (4.48-8.68,<br>p<0.001)    | 5.26 (3.79-7.29,<br>p<0.001)    |
|                                    | 60-69              | 11035 (100.0) | 11.72 (8.43-16.27,<br>p<0.001)  | 9.68 (6.99-13.40,<br>p<0.001)   |
|                                    | 70-79              | 16445 (100.0) | 18.38 (13.25-25.51,<br>p<0.001) | 15.44 (11.07-21.54,<br>p<0.001) |
|                                    | 80-89              | 19771 (100.0) | 23.49 (16.93-32.59,<br>p<0.001) | 20.15 (14.56-27.89,<br>p<0.001) |
|                                    | 90+                | 7204 (100.0)  | 27.63 (19.89-38.36,<br>p<0.001) | 24.73 (17.77-34.40,<br>p<0.001) |
|                                    | Sex at Birth       | Female        | 31733 (100.0)                   | -                               |
|                                    | Male               | 40648 (100.0) | 1.23 (1.20-1.27,<br>p<0.001)    | 1.30 (1.26-1.33,<br>p<0.001)    |
| Deprivation                        | 1 (least deprived) | 10347 (100.0) | -                               | -                               |
|                                    | 2                  | 12775 (100.0) | 1.00 (0.96-1.05,<br>p=0.965)    | 1.03 (0.97-1.08,<br>p=0.348)    |
|                                    | 3                  | 15712 (100.0) | 0.99 (0.95-1.04,<br>p=0.743)    | 1.06 (0.99-1.12,<br>p=0.074)    |
|                                    | 4                  | 15880 (100.0) | 0.95 (0.91-1.00,<br>p=0.039)    | 1.07 (1.01-1.13,<br>p=0.033)    |
|                                    | 5 (most deprived)  | 17845 (100.0) | 0.93 (0.89-0.97,<br>p=0.001)    | 1.09 (1.03-1.15,<br>p=0.002)    |

116  
 117  
 118

| Dependent:<br>Survival (mortality) |                    |               | HR (univariable)                | HR (multivariable)              |
|------------------------------------|--------------------|---------------|---------------------------------|---------------------------------|
| Systemic<br>Complication           | No                 | 62531 (100.0) | -                               | -                               |
|                                    | Yes                | 11970 (100.0) | 1.27 (1.23-1.31,<br>p<0.001)    | 1.20 (1.15-1.26,<br>p<0.001)    |
| Age on admission                   | 19-29              | 1477 (100.0)  | -                               | -                               |
|                                    | 30-39              | 2707 (100.0)  | 1.82 (1.25-2.64,<br>p=0.002)    | 1.75 (1.27-2.42,<br>p=0.001)    |
|                                    | 40-49              | 4930 (100.0)  | 3.22 (2.29-4.53,<br>p<0.001)    | 3.00 (2.12-4.26,<br>p<0.001)    |
|                                    | 50-59              | 9003 (100.0)  | 6.24 (4.48-8.68,<br>p<0.001)    | 5.79 (4.17-8.04,<br>p<0.001)    |
|                                    | 60-69              | 11035 (100.0) | 11.72 (8.43-16.27,<br>p<0.001)  | 10.87 (7.84-15.07,<br>p<0.001)  |
|                                    | 70-79              | 16445 (100.0) | 18.38 (13.25-25.51,<br>p<0.001) | 17.25 (12.36-24.09,<br>p<0.001) |
|                                    | 80-89              | 19771 (100.0) | 23.49 (16.93-32.59,<br>p<0.001) | 22.50 (16.24-31.18,<br>p<0.001) |
|                                    | 90+                | 7204 (100.0)  | 27.63 (19.89-38.36,<br>p<0.001) | 27.61 (19.83-38.43,<br>p<0.001) |
|                                    | Sex at Birth       | Female        | 31733 (100.0)                   | -                               |
|                                    | Male               | 40648 (100.0) | 1.23 (1.20-1.27,<br>p<0.001)    | 1.34 (1.30-1.38,<br>p<0.001)    |
| Deprivation                        | 1 (least deprived) | 10347 (100.0) | -                               | -                               |
|                                    | 2                  | 12775 (100.0) | 1.00 (0.96-1.05,<br>p=0.965)    | 1.03 (0.98-1.08,<br>p=0.281)    |
|                                    | 3                  | 15712 (100.0) | 0.99 (0.95-1.04,<br>p=0.743)    | 1.06 (1.00-1.12,<br>p=0.059)    |
|                                    | 4                  | 15880 (100.0) | 0.95 (0.91-1.00,<br>p=0.039)    | 1.07 (1.02-1.13,<br>p=0.012)    |
|                                    | 5 (most deprived)  | 17845 (100.0) | 0.93 (0.89-0.97,<br>p=0.001)    | 1.09 (1.04-1.15,<br>p=0.001)    |

120

121

| Dependent:<br>Survival (mortality) |                    |               | HR (univariable)                | HR (multivariable)              |
|------------------------------------|--------------------|---------------|---------------------------------|---------------------------------|
| Renal complication                 | No                 | 56691 (100.0) | -                               | -                               |
|                                    | Yes                | 17810 (100.0) | 1.68 (1.64-1.73,<br>p<0.001)    | 1.49 (1.42-1.55,<br>p<0.001)    |
| Age on admission                   | 19-29              | 1477 (100.0)  | -                               | -                               |
|                                    | 30-39              | 2707 (100.0)  | 1.82 (1.25-2.64,<br>p=0.002)    | 1.74 (1.26-2.39,<br>p=0.001)    |
|                                    | 40-49              | 4930 (100.0)  | 3.22 (2.29-4.53,<br>p<0.001)    | 2.92 (2.06-4.14,<br>p<0.001)    |
|                                    | 50-59              | 9003 (100.0)  | 6.24 (4.48-8.68,<br>p<0.001)    | 5.53 (3.99-7.68,<br>p<0.001)    |
|                                    | 60-69              | 11035 (100.0) | 11.72 (8.43-16.27,<br>p<0.001)  | 10.22 (7.37-14.17,<br>p<0.001)  |
|                                    | 70-79              | 16445 (100.0) | 18.38 (13.25-25.51,<br>p<0.001) | 16.24 (11.63-22.67,<br>p<0.001) |
|                                    | 80-89              | 19771 (100.0) | 23.49 (16.93-32.59,<br>p<0.001) | 21.16 (15.27-29.32,<br>p<0.001) |
|                                    | 90+                | 7204 (100.0)  | 27.63 (19.89-38.36,<br>p<0.001) | 26.05 (18.70-36.27,<br>p<0.001) |
|                                    | Sex at Birth       | Female        | 31733 (100.0)                   | -                               |
| Male                               |                    | 40648 (100.0) | 1.23 (1.20-1.27,<br>p<0.001)    | 1.31 (1.27-1.35,<br>p<0.001)    |
| Deprivation                        | 1 (least deprived) | 10347 (100.0) | -                               | -                               |
|                                    | 2                  | 12775 (100.0) | 1.00 (0.96-1.05,<br>p=0.965)    | 1.03 (0.98-1.08,<br>p=0.317)    |
|                                    | 3                  | 15712 (100.0) | 0.99 (0.95-1.04,<br>p=0.743)    | 1.05 (0.99-1.11,<br>p=0.089)    |
|                                    | 4                  | 15880 (100.0) | 0.95 (0.91-1.00,<br>p=0.039)    | 1.06 (1.00-1.12,<br>p=0.046)    |
|                                    | 5 (most deprived)  | 17845 (100.0) | 0.93 (0.89-0.97,<br>p=0.001)    | 1.08 (1.02-1.13,<br>p=0.006)    |

| Dependent:<br>Survival (mortality)        |                    |               | HR (univariable)                | HR (multivariable)              |
|-------------------------------------------|--------------------|---------------|---------------------------------|---------------------------------|
| Gastrointestinal or<br>liver complication | No                 | 66464 (100.0) | -                               | -                               |
|                                           | Yes                | 8037 (100.0)  | 1.28 (1.23-1.33,<br>p<0.001)    | 1.50 (1.44-1.57,<br>p<0.001)    |
| Age on admission                          | 19-29              | 1477 (100.0)  | -                               | -                               |
|                                           | 30-39              | 2707 (100.0)  | 1.82 (1.25-2.64,<br>p=0.002)    | 1.74 (1.26-2.39,<br>p=0.001)    |
|                                           | 40-49              | 4930 (100.0)  | 3.22 (2.29-4.53,<br>p<0.001)    | 2.97 (2.10-4.20,<br>p<0.001)    |
|                                           | 50-59              | 9003 (100.0)  | 6.24 (4.48-8.68,<br>p<0.001)    | 5.71 (4.12-7.92,<br>p<0.001)    |
|                                           | 60-69              | 11035 (100.0) | 11.72 (8.43-16.27,<br>p<0.001)  | 10.85 (7.84-15.02,<br>p<0.001)  |
|                                           | 70-79              | 16445 (100.0) | 18.38 (13.25-25.51,<br>p<0.001) | 17.54 (12.58-24.45,<br>p<0.001) |
|                                           | 80-89              | 19771 (100.0) | 23.49 (16.93-32.59,<br>p<0.001) | 23.15 (16.73-32.03,<br>p<0.001) |
|                                           | 90+                | 7204 (100.0)  | 27.63 (19.89-38.36,<br>p<0.001) | 28.46 (20.46-39.59,<br>p<0.001) |
| Sex at Birth                              | Female             | 31733 (100.0) | -                               | -                               |
|                                           | Male               | 40648 (100.0) | 1.23 (1.20-1.27,<br>p<0.001)    | 1.33 (1.29-1.37,<br>p<0.001)    |
| Deprivation                               | 1 (least deprived) | 10347 (100.0) | -                               | -                               |
|                                           | 2                  | 12775 (100.0) | 1.00 (0.96-1.05,<br>p=0.965)    | 1.03 (0.98-1.08,<br>p=0.292)    |
|                                           | 3                  | 15712 (100.0) | 0.99 (0.95-1.04,<br>p=0.743)    | 1.06 (1.00-1.12,<br>p=0.052)    |
|                                           | 4                  | 15880 (100.0) | 0.95 (0.91-1.00,<br>p=0.039)    | 1.08 (1.02-1.14,<br>p=0.011)    |
|                                           | 5 (most deprived)  | 17845 (100.0) | 0.93 (0.89-0.97,<br>p=0.001)    | 1.09 (1.04-1.15,<br>p=0.001)    |

125

126

| Dependent:<br>Survival (mortality) |                    |               | HR (univariable)                | HR (multivariable)              |
|------------------------------------|--------------------|---------------|---------------------------------|---------------------------------|
| Cardiovascular complication        | No                 | 65498 (100.0) | -                               | -                               |
|                                    | Yes                | 9003 (100.0)  | 2.32 (2.25-2.39,<br>p<0.001)    | 1.98 (1.85-2.11,<br>p<0.001)    |
| Age on admission                   | 19-29              | 1477 (100.0)  | -                               | -                               |
|                                    | 30-39              | 2707 (100.0)  | 1.82 (1.25-2.64,<br>p=0.002)    | 1.74 (1.26-2.39,<br>p=0.001)    |
|                                    | 40-49              | 4930 (100.0)  | 3.22 (2.29-4.53,<br>p<0.001)    | 2.93 (2.07-4.15,<br>p<0.001)    |
|                                    | 50-59              | 9003 (100.0)  | 6.24 (4.48-8.68,<br>p<0.001)    | 5.57 (4.02-7.73,<br>p<0.001)    |
|                                    | 60-69              | 11035 (100.0) | 11.72 (8.43-16.27,<br>p<0.001)  | 10.23 (7.38-14.17,<br>p<0.001)  |
|                                    | 70-79              | 16445 (100.0) | 18.38 (13.25-25.51,<br>p<0.001) | 16.11 (11.55-22.48,<br>p<0.001) |
|                                    | 80-89              | 19771 (100.0) | 23.49 (16.93-32.59,<br>p<0.001) | 20.85 (15.05-28.88,<br>p<0.001) |
|                                    | 90+                | 7204 (100.0)  | 27.63 (19.89-38.36,<br>p<0.001) | 25.50 (18.34-35.45,<br>p<0.001) |
|                                    | Sex at Birth       | Female        | 31733 (100.0)                   | -                               |
|                                    | Male               | 40648 (100.0) | 1.23 (1.20-1.27,<br>p<0.001)    | 1.32 (1.28-1.36,<br>p<0.001)    |
| Deprivation                        | 1 (least deprived) | 10347 (100.0) | -                               | -                               |
|                                    | 2                  | 12775 (100.0) | 1.00 (0.96-1.05,<br>p=0.965)    | 1.03 (0.98-1.09,<br>p=0.219)    |
|                                    | 3                  | 15712 (100.0) | 0.99 (0.95-1.04,<br>p=0.743)    | 1.06 (1.00-1.12,<br>p=0.053)    |
|                                    | 4                  | 15880 (100.0) | 0.95 (0.91-1.00,<br>p=0.039)    | 1.07 (1.02-1.14,<br>p=0.012)    |
|                                    | 5 (most deprived)  | 17845 (100.0) | 0.93 (0.89-0.97,<br>p=0.001)    | 1.10 (1.05-1.16,<br>p<0.001)    |

| Dependent:<br>Survival (mortality) |                    |               | HR (univariable)                | HR (multivariable)              |
|------------------------------------|--------------------|---------------|---------------------------------|---------------------------------|
| Neurological complication          | No                 | 71340 (100.0) | -                               | -                               |
|                                    | Yes                | 3161 (100.0)  | 1.29 (1.22-1.37,<br>p<0.001)    | 1.21 (1.13-1.29,<br>p<0.001)    |
| Age on admission                   | 19-29              | 1477 (100.0)  | -                               | -                               |
|                                    | 30-39              | 2707 (100.0)  | 1.82 (1.25-2.64,<br>p=0.002)    | 1.76 (1.28-2.43,<br>p=0.001)    |
|                                    | 40-49              | 4930 (100.0)  | 3.22 (2.29-4.53,<br>p<0.001)    | 3.03 (2.13-4.29,<br>p<0.001)    |
|                                    | 50-59              | 9003 (100.0)  | 6.24 (4.48-8.68,<br>p<0.001)    | 5.84 (4.21-8.11,<br>p<0.001)    |
|                                    | 60-69              | 11035 (100.0) | 11.72 (8.43-16.27,<br>p<0.001)  | 10.99 (7.93-15.24,<br>p<0.001)  |
|                                    | 70-79              | 16445 (100.0) | 18.38 (13.25-25.51,<br>p<0.001) | 17.42 (12.48-24.31,<br>p<0.001) |
|                                    | 80-89              | 19771 (100.0) | 23.49 (16.93-32.59,<br>p<0.001) | 22.70 (16.38-31.44,<br>p<0.001) |
|                                    | 90+                | 7204 (100.0)  | 27.63 (19.89-38.36,<br>p<0.001) | 27.85 (20.00-38.77,<br>p<0.001) |
|                                    | Sex at Birth       |               |                                 |                                 |
|                                    | Female             | 31733 (100.0) | -                               | -                               |
|                                    | Male               | 40648 (100.0) | 1.23 (1.20-1.27,<br>p<0.001)    | 1.34 (1.31-1.38,<br>p<0.001)    |
| Deprivation                        | 1 (least deprived) | 10347 (100.0) | -                               | -                               |
|                                    | 2                  | 12775 (100.0) | 1.00 (0.96-1.05,<br>p=0.965)    | 1.03 (0.98-1.08,<br>p=0.287)    |
|                                    | 3                  | 15712 (100.0) | 0.99 (0.95-1.04,<br>p=0.743)    | 1.06 (1.00-1.12,<br>p=0.060)    |
|                                    | 4                  | 15880 (100.0) | 0.95 (0.91-1.00,<br>p=0.039)    | 1.07 (1.01-1.13,<br>p=0.014)    |
|                                    | 5 (most deprived)  | 17845 (100.0) | 0.93 (0.89-0.97,<br>p=0.001)    | 1.09 (1.03-1.14,<br>p=0.001)    |

130

131

| Dependent:<br>Survival (mortality) |                    |               | HR (univariable)                | HR (multivariable)              |
|------------------------------------|--------------------|---------------|---------------------------------|---------------------------------|
| Respiratory complication           | No                 | 60982 (100.0) | -                               | -                               |
|                                    | Yes                | 13519 (100.0) | 1.89 (1.83-1.94,<br>p<0.001)    | 2.15 (2.04-2.27,<br>p<0.001)    |
| Age on admission                   | 19-29              | 1477 (100.0)  | -                               | -                               |
|                                    | 30-39              | 2707 (100.0)  | 1.82 (1.25-2.64,<br>p=0.002)    | 1.65 (1.20-2.27,<br>p=0.002)    |
|                                    | 40-49              | 4930 (100.0)  | 3.22 (2.29-4.53,<br>p<0.001)    | 2.67 (1.89-3.78,<br>p<0.001)    |
|                                    | 50-59              | 9003 (100.0)  | 6.24 (4.48-8.68,<br>p<0.001)    | 5.12 (3.70-7.10,<br>p<0.001)    |
|                                    | 60-69              | 11035 (100.0) | 11.72 (8.43-16.27,<br>p<0.001)  | 9.71 (7.01-13.45,<br>p<0.001)   |
|                                    | 70-79              | 16445 (100.0) | 18.38 (13.25-25.51,<br>p<0.001) | 16.45 (11.80-22.92,<br>p<0.001) |
|                                    | 80-89              | 19771 (100.0) | 23.49 (16.93-32.59,<br>p<0.001) | 22.33 (16.15-30.89,<br>p<0.001) |
|                                    | 90+                | 7204 (100.0)  | 27.63 (19.89-38.36,<br>p<0.001) | 27.49 (19.78-38.21,<br>p<0.001) |
|                                    | Sex at Birth       | Female        | 31733 (100.0)                   | -                               |
|                                    | Male               | 40648 (100.0) | 1.23 (1.20-1.27,<br>p<0.001)    | 1.31 (1.27-1.35,<br>p<0.001)    |
| Deprivation                        | 1 (least deprived) | 10347 (100.0) | -                               | -                               |
|                                    | 2                  | 12775 (100.0) | 1.00 (0.96-1.05,<br>p=0.965)    | 1.03 (0.98-1.08,<br>p=0.209)    |
|                                    | 3                  | 15712 (100.0) | 0.99 (0.95-1.04,<br>p=0.743)    | 1.05 (0.99-1.11,<br>p=0.135)    |
|                                    | 4                  | 15880 (100.0) | 0.95 (0.91-1.00,<br>p=0.039)    | 1.07 (1.01-1.13,<br>p=0.022)    |
|                                    | 5 (most deprived)  | 17845 (100.0) | 0.93 (0.89-0.97,<br>p=0.001)    | 1.10 (1.04-1.16,<br>p<0.001)    |

134 **Supplementary table 9 - Effect of complications on odds of critical care admission**  
 135 **(adjusted logistic regression models) for figure 2D**

136 *Supplementary table 9A - Any complication*

| Dependent:<br>Critical Care<br>Admission |                       | No           | Yes         | OR (univariable)             | OR (multilevel)              |
|------------------------------------------|-----------------------|--------------|-------------|------------------------------|------------------------------|
| Any<br>complication                      | No                    | 33809 (95.1) | 1760 (4.9)  | -                            | -                            |
|                                          | Yes                   | 27937 (77.4) | 8155 (22.6) | 5.61 (5.31-5.92,<br>p<0.001) | 7.25 (6.83-7.69,<br>p<0.001) |
| Age on<br>admission                      | 19-29                 | 1241 (85.8)  | 205 (14.2)  | -                            | -                            |
|                                          | 30-39                 | 2101 (79.1)  | 555 (20.9)  | 1.60 (1.34-1.91,<br>p<0.001) | 1.33 (1.10-1.61,<br>p=0.004) |
|                                          | 40-49                 | 3596 (74.0)  | 1264 (26.0) | 2.13 (1.82-2.51,<br>p<0.001) | 1.57 (1.32-1.88,<br>p<0.001) |
|                                          | 50-59                 | 6389 (71.7)  | 2521 (28.3) | 2.39 (2.05-2.80,<br>p<0.001) | 1.63 (1.38-1.94,<br>p<0.001) |
|                                          | 60-69                 | 8166 (74.9)  | 2740 (25.1) | 2.03 (1.75-2.38,<br>p<0.001) | 1.24 (1.04-1.47,<br>p=0.014) |
|                                          | 70-79                 | 14285 (87.9) | 1960 (12.1) | 0.83 (0.71-0.97,<br>p=0.019) | 0.47 (0.39-0.56,<br>p<0.001) |
|                                          | 80-89                 | 18964 (97.1) | 567 (2.9)   | 0.18 (0.15-0.21,<br>p<0.001) | 0.10 (0.08-0.12,<br>p<0.001) |
|                                          | 90+                   | 7004 (98.6)  | 103 (1.4)   | 0.09 (0.07-0.11,<br>p<0.001) | 0.05 (0.04-0.07,<br>p<0.001) |
| Sex at Birth                             | Female                | 28230 (90.1) | 3100 (9.9)  | -                            | -                            |
|                                          | Male                  | 33348 (83.1) | 6792 (16.9) | 1.85 (1.77-1.94,<br>p<0.001) | 1.49 (1.42-1.57,<br>p<0.001) |
| Deprivation                              | 1 (least<br>deprived) | 8747 (86.2)  | 1401 (13.8) | -                            | -                            |
|                                          | 2                     | 10923 (86.9) | 1653 (13.1) | 0.94 (0.88-1.02,<br>p=0.146) | 0.86 (0.79-0.94,<br>p=0.001) |
|                                          | 3                     | 13352 (86.3) | 2115 (13.7) | 0.99 (0.92-1.06,<br>p=0.765) | 0.89 (0.82-0.98,<br>p=0.012) |
|                                          | 4                     | 13360 (85.1) | 2340 (14.9) | 1.09 (1.02-1.17,<br>p=0.014) | 0.89 (0.82-0.97,<br>p=0.011) |
|                                          | 5 (most<br>deprived)  | 15352 (86.5) | 2405 (13.5) | 0.98 (0.91-1.05,<br>p=0.540) | 0.78 (0.72-0.85,<br>p<0.001) |

137  
138



| Dependent:<br>Critical Care<br>Admission |                       | No           | Yes         | OR (univariable)             | OR (multilevel)              |
|------------------------------------------|-----------------------|--------------|-------------|------------------------------|------------------------------|
| Systemic<br>complication                 | No                    | 53004 (88.5) | 6875 (11.5) | -                            | -                            |
|                                          | Yes                   | 8742 (74.2)  | 3040 (25.8) | 2.68 (2.55-2.81,<br>p<0.001) | 3.15 (2.97-3.33,<br>p<0.001) |
| Age on<br>admission                      | 19-29                 | 1241 (85.8)  | 205 (14.2)  | -                            | -                            |
|                                          | 30-39                 | 2101 (79.1)  | 555 (20.9)  | 1.60 (1.34-1.91,<br>p<0.001) | 1.45 (1.21-1.74,<br>p<0.001) |
|                                          | 40-49                 | 3596 (74.0)  | 1264 (26.0) | 2.13 (1.82-2.51,<br>p<0.001) | 1.84 (1.56-2.18,<br>p<0.001) |
|                                          | 50-59                 | 6389 (71.7)  | 2521 (28.3) | 2.39 (2.05-2.80,<br>p<0.001) | 2.05 (1.74-2.41,<br>p<0.001) |
|                                          | 60-69                 | 8166 (74.9)  | 2740 (25.1) | 2.03 (1.75-2.38,<br>p<0.001) | 1.70 (1.45-2.00,<br>p<0.001) |
|                                          | 70-79                 | 14285 (87.9) | 1960 (12.1) | 0.83 (0.71-0.97,<br>p=0.019) | 0.69 (0.58-0.81,<br>p<0.001) |
|                                          | 80-89                 | 18964 (97.1) | 567 (2.9)   | 0.18 (0.15-0.21,<br>p<0.001) | 0.15 (0.13-0.18,<br>p<0.001) |
|                                          | 90+                   | 7004 (98.6)  | 103 (1.4)   | 0.09 (0.07-0.11,<br>p<0.001) | 0.08 (0.06-0.10,<br>p<0.001) |
| Sex at Birth                             | Female                | 28230 (90.1) | 3100 (9.9)  | -                            | -                            |
|                                          | Male                  | 33348 (83.1) | 6792 (16.9) | 1.85 (1.77-1.94,<br>p<0.001) | 1.65 (1.58-1.74,<br>p<0.001) |
| Deprivation                              | 1 (least<br>deprived) | 8747 (86.2)  | 1401 (13.8) | -                            | -                            |
|                                          | 2                     | 10923 (86.9) | 1653 (13.1) | 0.94 (0.88-1.02,<br>p=0.146) | 0.88 (0.81-0.96,<br>p=0.005) |
|                                          | 3                     | 13352 (86.3) | 2115 (13.7) | 0.99 (0.92-1.06,<br>p=0.765) | 0.90 (0.83-0.98,<br>p=0.020) |
|                                          | 4                     | 13360 (85.1) | 2340 (14.9) | 1.09 (1.02-1.17,<br>p=0.014) | 0.91 (0.84-0.99,<br>p=0.035) |
|                                          | 5 (most<br>deprived)  | 15352 (86.5) | 2405 (13.5) | 0.98 (0.91-1.05,<br>p=0.540) | 0.82 (0.75-0.89,<br>p<0.001) |

| Dependent:<br>Critical Care<br>Admission |                    | No           | Yes         | OR (univariable)          | OR (multilevel)           |
|------------------------------------------|--------------------|--------------|-------------|---------------------------|---------------------------|
| Renal complication                       | No                 | 48812 (90.3) | 5238 (9.7)  | -                         | -                         |
|                                          | Yes                | 12934 (73.4) | 4677 (26.6) | 3.37 (3.22-3.52, p<0.001) | 4.36 (4.14-4.58, p<0.001) |
| Age on admission                         | 19-29              | 1241 (85.8)  | 205 (14.2)  | -                         | -                         |
|                                          | 30-39              | 2101 (79.1)  | 555 (20.9)  | 1.60 (1.34-1.91, p<0.001) | 1.45 (1.21-1.74, p<0.001) |
|                                          | 40-49              | 3596 (74.0)  | 1264 (26.0) | 2.13 (1.82-2.51, p<0.001) | 1.74 (1.47-2.06, p<0.001) |
|                                          | 50-59              | 6389 (71.7)  | 2521 (28.3) | 2.39 (2.05-2.80, p<0.001) | 1.82 (1.54-2.14, p<0.001) |
|                                          | 60-69              | 8166 (74.9)  | 2740 (25.1) | 2.03 (1.75-2.38, p<0.001) | 1.40 (1.19-1.65, p<0.001) |
|                                          | 70-79              | 14285 (87.9) | 1960 (12.1) | 0.83 (0.71-0.97, p=0.019) | 0.54 (0.46-0.64, p<0.001) |
|                                          | 80-89              | 18964 (97.1) | 567 (2.9)   | 0.18 (0.15-0.21, p<0.001) | 0.11 (0.10-0.14, p<0.001) |
|                                          | 90+                | 7004 (98.6)  | 103 (1.4)   | 0.09 (0.07-0.11, p<0.001) | 0.06 (0.05-0.07, p<0.001) |
| Sex at Birth                             | Female             | 28230 (90.1) | 3100 (9.9)  | -                         | -                         |
|                                          | Male               | 33348 (83.1) | 6792 (16.9) | 1.85 (1.77-1.94, p<0.001) | 1.51 (1.44-1.59, p<0.001) |
| Deprivation                              | 1 (least deprived) | 8747 (86.2)  | 1401 (13.8) | -                         | -                         |
|                                          | 2                  | 10923 (86.9) | 1653 (13.1) | 0.94 (0.88-1.02, p=0.146) | 0.89 (0.81-0.97, p=0.009) |
|                                          | 3                  | 13352 (86.3) | 2115 (13.7) | 0.99 (0.92-1.06, p=0.765) | 0.89 (0.82-0.97, p=0.011) |
|                                          | 4                  | 13360 (85.1) | 2340 (14.9) | 1.09 (1.02-1.17, p=0.014) | 0.89 (0.81-0.97, p=0.006) |
|                                          | 5 (most deprived)  | 15352 (86.5) | 2405 (13.5) | 0.98 (0.91-1.05, p=0.540) | 0.79 (0.73-0.86, p<0.001) |

142

143

| Dependent:<br>Critical Care<br>Admission     |                       | No           | Yes         | OR (univariable)             | OR (multilevel)              |
|----------------------------------------------|-----------------------|--------------|-------------|------------------------------|------------------------------|
| Gastrointestinal<br>or liver<br>complication | No                    | 56625 (88.8) | 7173 (11.2) | -                            | -                            |
|                                              | Yes                   | 5121 (65.1)  | 2742 (34.9) | 4.23 (4.01-4.45,<br>p<0.001) | 3.52 (3.32-3.74,<br>p<0.001) |
| Age on<br>admission                          | 19-29                 | 1241 (85.8)  | 205 (14.2)  | -                            | -                            |
|                                              | 30-39                 | 2101 (79.1)  | 555 (20.9)  | 1.60 (1.34-1.91,<br>p<0.001) | 1.45 (1.21-1.75,<br>p<0.001) |
|                                              | 40-49                 | 3596 (74.0)  | 1264 (26.0) | 2.13 (1.82-2.51,<br>p<0.001) | 1.84 (1.56-2.19,<br>p<0.001) |
|                                              | 50-59                 | 6389 (71.7)  | 2521 (28.3) | 2.39 (2.05-2.80,<br>p<0.001) | 2.08 (1.77-2.45,<br>p<0.001) |
|                                              | 60-69                 | 8166 (74.9)  | 2740 (25.1) | 2.03 (1.75-2.38,<br>p<0.001) | 1.82 (1.55-2.14,<br>p<0.001) |
|                                              | 70-79                 | 14285 (87.9) | 1960 (12.1) | 0.83 (0.71-0.97,<br>p=0.019) | 0.77 (0.65-0.90,<br>p=0.001) |
|                                              | 80-89                 | 18964 (97.1) | 567 (2.9)   | 0.18 (0.15-0.21,<br>p<0.001) | 0.18 (0.15-0.21,<br>p<0.001) |
|                                              | 90+                   | 7004 (98.6)  | 103 (1.4)   | 0.09 (0.07-0.11,<br>p<0.001) | 0.09 (0.07-0.12,<br>p<0.001) |
| Sex at Birth                                 | Female                | 28230 (90.1) | 3100 (9.9)  | -                            | -                            |
|                                              | Male                  | 33348 (83.1) | 6792 (16.9) | 1.85 (1.77-1.94,<br>p<0.001) | 1.56 (1.48-1.63,<br>p<0.001) |
| Deprivation                                  | 1 (least<br>deprived) | 8747 (86.2)  | 1401 (13.8) | -                            | -                            |
|                                              | 2                     | 10923 (86.9) | 1653 (13.1) | 0.94 (0.88-1.02,<br>p=0.146) | 0.89 (0.82-0.97,<br>p=0.009) |
|                                              | 3                     | 13352 (86.3) | 2115 (13.7) | 0.99 (0.92-1.06,<br>p=0.765) | 0.93 (0.86-1.01,<br>p=0.096) |
|                                              | 4                     | 13360 (85.1) | 2340 (14.9) | 1.09 (1.02-1.17,<br>p=0.014) | 0.94 (0.87-1.03,<br>p=0.170) |
|                                              | 5 (most<br>deprived)  | 15352 (86.5) | 2405 (13.5) | 0.98 (0.91-1.05,<br>p=0.540) | 0.85 (0.78-0.92,<br>p<0.001) |

145

146

| Dependent:<br>Critical Care<br>Admission |                    | No           | Yes         | OR (univariable)          | OR (multilevel)           |
|------------------------------------------|--------------------|--------------|-------------|---------------------------|---------------------------|
| Cardiovascular complication              | No                 | 55139 (87.9) | 7619 (12.1) | -                         | -                         |
|                                          | Yes                | 6607 (74.2)  | 2296 (25.8) | 2.51 (2.38-2.65, p<0.001) | 3.64 (3.42-3.88, p<0.001) |
| Age on admission                         | 19-29              | 1241 (85.8)  | 205 (14.2)  | -                         | -                         |
|                                          | 30-39              | 2101 (79.1)  | 555 (20.9)  | 1.60 (1.34-1.91, p<0.001) | 1.48 (1.24-1.78, p<0.001) |
|                                          | 40-49              | 3596 (74.0)  | 1264 (26.0) | 2.13 (1.82-2.51, p<0.001) | 1.83 (1.54-2.16, p<0.001) |
|                                          | 50-59              | 6389 (71.7)  | 2521 (28.3) | 2.39 (2.05-2.80, p<0.001) | 2.02 (1.72-2.37, p<0.001) |
|                                          | 60-69              | 8166 (74.9)  | 2740 (25.1) | 2.03 (1.75-2.38, p<0.001) | 1.63 (1.39-1.91, p<0.001) |
|                                          | 70-79              | 14285 (87.9) | 1960 (12.1) | 0.83 (0.71-0.97, p=0.019) | 0.63 (0.53-0.74, p<0.001) |
|                                          | 80-89              | 18964 (97.1) | 567 (2.9)   | 0.18 (0.15-0.21, p<0.001) | 0.13 (0.11-0.16, p<0.001) |
|                                          | 90+                | 7004 (98.6)  | 103 (1.4)   | 0.09 (0.07-0.11, p<0.001) | 0.07 (0.05-0.09, p<0.001) |
| Sex at Birth                             | Female             | 28230 (90.1) | 3100 (9.9)  | -                         | -                         |
|                                          | Male               | 33348 (83.1) | 6792 (16.9) | 1.85 (1.77-1.94, p<0.001) | 1.61 (1.53-1.69, p<0.001) |
| Deprivation                              | 1 (least deprived) | 8747 (86.2)  | 1401 (13.8) | -                         | -                         |
|                                          | 2                  | 10923 (86.9) | 1653 (13.1) | 0.94 (0.88-1.02, p=0.146) | 0.89 (0.81-0.97, p=0.006) |
|                                          | 3                  | 13352 (86.3) | 2115 (13.7) | 0.99 (0.92-1.06, p=0.765) | 0.92 (0.84-1.00, p=0.046) |
|                                          | 4                  | 13360 (85.1) | 2340 (14.9) | 1.09 (1.02-1.17, p=0.014) | 0.92 (0.85-1.00, p=0.050) |
|                                          | 5 (most deprived)  | 15352 (86.5) | 2405 (13.5) | 0.98 (0.91-1.05, p=0.540) | 0.83 (0.76-0.90, p<0.001) |

148

149

| Dependent:<br>Critical Care<br>Admission |                       | No           | Yes         | OR (univariable)             | OR (multilevel)              |
|------------------------------------------|-----------------------|--------------|-------------|------------------------------|------------------------------|
| Neurological<br>complication             | No                    | 59321 (86.5) | 9264 (13.5) | -                            | -                            |
|                                          | Yes                   | 2425 (78.8)  | 651 (21.2)  | 1.72 (1.57-1.88,<br>p<0.001) | 1.88 (1.70-2.08,<br>p<0.001) |
| Age on<br>admission                      | 19-29                 | 1241 (85.8)  | 205 (14.2)  | -                            | -                            |
|                                          | 30-39                 | 2101 (79.1)  | 555 (20.9)  | 1.60 (1.34-1.91,<br>p<0.001) | 1.51 (1.26-1.81,<br>p<0.001) |
|                                          | 40-49                 | 3596 (74.0)  | 1264 (26.0) | 2.13 (1.82-2.51,<br>p<0.001) | 1.91 (1.62-2.26,<br>p<0.001) |
|                                          | 50-59                 | 6389 (71.7)  | 2521 (28.3) | 2.39 (2.05-2.80,<br>p<0.001) | 2.17 (1.85-2.55,<br>p<0.001) |
|                                          | 60-69                 | 8166 (74.9)  | 2740 (25.1) | 2.03 (1.75-2.38,<br>p<0.001) | 1.85 (1.58-2.17,<br>p<0.001) |
|                                          | 70-79                 | 14285 (87.9) | 1960 (12.1) | 0.83 (0.71-0.97,<br>p=0.019) | 0.75 (0.64-0.88,<br>p<0.001) |
|                                          | 80-89                 | 18964 (97.1) | 567 (2.9)   | 0.18 (0.15-0.21,<br>p<0.001) | 0.17 (0.14-0.20,<br>p<0.001) |
|                                          | 90+                   | 7004 (98.6)  | 103 (1.4)   | 0.09 (0.07-0.11,<br>p<0.001) | 0.09 (0.07-0.11,<br>p<0.001) |
| Sex at Birth                             | Female                | 28230 (90.1) | 3100 (9.9)  | -                            | -                            |
|                                          | Male                  | 33348 (83.1) | 6792 (16.9) | 1.85 (1.77-1.94,<br>p<0.001) | 1.65 (1.57-1.73,<br>p<0.001) |
| Deprivation                              | 1 (least<br>deprived) | 8747 (86.2)  | 1401 (13.8) | -                            | -                            |
|                                          | 2                     | 10923 (86.9) | 1653 (13.1) | 0.94 (0.88-1.02,<br>p=0.146) | 0.90 (0.82-0.97,<br>p=0.010) |
|                                          | 3                     | 13352 (86.3) | 2115 (13.7) | 0.99 (0.92-1.06,<br>p=0.765) | 0.92 (0.85-1.00,<br>p=0.065) |
|                                          | 4                     | 13360 (85.1) | 2340 (14.9) | 1.09 (1.02-1.17,<br>p=0.014) | 0.94 (0.86-1.02,<br>p=0.114) |
|                                          | 5 (most<br>deprived)  | 15352 (86.5) | 2405 (13.5) | 0.98 (0.91-1.05,<br>p=0.540) | 0.83 (0.77-0.91,<br>p<0.001) |

151

152

| Dependent:<br>Critical Care<br>Admission |                    | No           | Yes         | OR (univariable)             | OR (multilevel)              |
|------------------------------------------|--------------------|--------------|-------------|------------------------------|------------------------------|
| Respiratory complication                 | No                 | 54321 (93.2) | 3986 (6.8)  | -                            | -                            |
|                                          | Yes                | 7425 (55.6)  | 5929 (44.4) | 10.88 (10.38-11.41, p<0.001) | 12.48 (11.81-13.18, p<0.001) |
| Age on admission                         | 19-29              | 1241 (85.8)  | 205 (14.2)  | -                            | -                            |
|                                          | 30-39              | 2101 (79.1)  | 555 (20.9)  | 1.60 (1.34-1.91, p<0.001)    | 1.28 (1.05-1.56, p=0.015)    |
|                                          | 40-49              | 3596 (74.0)  | 1264 (26.0) | 2.13 (1.82-2.51, p<0.001)    | 1.40 (1.17-1.68, p<0.001)    |
|                                          | 50-59              | 6389 (71.7)  | 2521 (28.3) | 2.39 (2.05-2.80, p<0.001)    | 1.56 (1.31-1.86, p<0.001)    |
|                                          | 60-69              | 8166 (74.9)  | 2740 (25.1) | 2.03 (1.75-2.38, p<0.001)    | 1.27 (1.06-1.51, p=0.008)    |
|                                          | 70-79              | 14285 (87.9) | 1960 (12.1) | 0.83 (0.71-0.97, p=0.019)    | 0.52 (0.44-0.62, p<0.001)    |
|                                          | 80-89              | 18964 (97.1) | 567 (2.9)   | 0.18 (0.15-0.21, p<0.001)    | 0.11 (0.09-0.14, p<0.001)    |
|                                          | 90+                | 7004 (98.6)  | 103 (1.4)   | 0.09 (0.07-0.11, p<0.001)    | 0.06 (0.04-0.08, p<0.001)    |
| Sex at Birth                             | Female             | 28230 (90.1) | 3100 (9.9)  | -                            | -                            |
|                                          | Male               | 33348 (83.1) | 6792 (16.9) | 1.85 (1.77-1.94, p<0.001)    | 1.53 (1.44-1.61, p<0.001)    |
| Deprivation                              | 1 (least deprived) | 8747 (86.2)  | 1401 (13.8) | -                            | -                            |
|                                          | 2                  | 10923 (86.9) | 1653 (13.1) | 0.94 (0.88-1.02, p=0.146)    | 0.86 (0.79-0.95, p=0.003)    |
|                                          | 3                  | 13352 (86.3) | 2115 (13.7) | 0.99 (0.92-1.06, p=0.765)    | 0.90 (0.82-0.99, p=0.029)    |
|                                          | 4                  | 13360 (85.1) | 2340 (14.9) | 1.09 (1.02-1.17, p=0.014)    | 0.88 (0.81-0.97, p=0.009)    |
|                                          | 5 (most deprived)  | 15352 (86.5) | 2405 (13.5) | 0.98 (0.91-1.05, p=0.540)    | 0.80 (0.73-0.88, p<0.001)    |

154

155

156 **Supplementary table 10 - Effect of complications on odds of worse ability to self-care at**  
 157 **discharge (adjusted logistic regression models) for figure 4C**

158 *Supplementary table 10A - Any complication*

| Dependent:<br>Self-care<br>ability |                       | Equivalent to<br>before<br>illness | Worse       | OR (univariable)             | OR (multilevel)              |
|------------------------------------|-----------------------|------------------------------------|-------------|------------------------------|------------------------------|
| Any<br>complication                | No                    | 19692 (77.4)                       | 5759 (22.6) | -                            | -                            |
|                                    | Yes                   | 12174 (61.7)                       | 7550 (38.3) | 2.12 (2.04-2.21,<br>p<0.001) | 2.41 (2.30-2.52,<br>p<0.001) |
| Age (years)                        | 19-29                 | 1121 (86.7)                        | 172 (13.3)  | -                            | -                            |
|                                    | 30-39                 | 1962 (83.7)                        | 383 (16.3)  | 1.27 (1.05-1.55,<br>p=0.015) | 1.54 (1.24-1.92,<br>p<0.001) |
|                                    | 40-49                 | 3331 (79.9)                        | 838 (20.1)  | 1.64 (1.38-1.96,<br>p<0.001) | 2.03 (1.66-2.48,<br>p<0.001) |
|                                    | 50-59                 | 5508 (78.8)                        | 1486 (21.2) | 1.76 (1.49-2.09,<br>p<0.001) | 2.22 (1.82-2.69,<br>p<0.001) |
|                                    | 60-69                 | 5451 (73.3)                        | 1990 (26.7) | 2.38 (2.02-2.82,<br>p<0.001) | 3.02 (2.49-3.66,<br>p<0.001) |
|                                    | 70-79                 | 6237 (66.5)                        | 3139 (33.5) | 3.28 (2.79-3.88,<br>p<0.001) | 4.18 (3.46-5.06,<br>p<0.001) |
|                                    | 80-89                 | 6069 (61.4)                        | 3810 (38.6) | 4.09 (3.48-4.84,<br>p<0.001) | 5.38 (4.45-6.50,<br>p<0.001) |
| Sex at Birth                       | 90+                   | 1940 (58.5)                        | 1377 (41.5) | 4.63 (3.89-5.52,<br>p<0.001) | 6.26 (5.13-7.65,<br>p<0.001) |
|                                    | Female                | 14550 (70.9)                       | 5968 (29.1) | -                            | -                            |
|                                    | Male                  | 17230 (70.2)                       | 7308 (29.8) | 1.03 (0.99-1.08,<br>p=0.107) | 1.05 (1.01-1.10,<br>p=0.021) |
| Deprivation                        | 1 (least<br>deprived) | 4468 (69.7)                        | 1946 (30.3) | -                            | -                            |
|                                    | 2                     | 5473 (70.0)                        | 2345 (30.0) | 0.98 (0.92-1.06,<br>p=0.655) | 0.97 (0.90-1.05,<br>p=0.442) |
|                                    | 3                     | 6751 (69.4)                        | 2983 (30.6) | 1.01 (0.95-1.09,<br>p=0.680) | 1.03 (0.95-1.12,<br>p=0.438) |
|                                    | 4                     | 7008 (70.2)                        | 2982 (29.8) | 0.98 (0.91-1.05,<br>p=0.504) | 1.07 (0.99-1.16,<br>p=0.095) |
|                                    | 5 (most<br>deprived)  | 8156 (72.8)                        | 3052 (27.2) | 0.86 (0.80-0.92,<br>p<0.001) | 1.03 (0.95-1.11,<br>p=0.545) |

159

160

| Dependent:<br>Self-care<br>ability |                       | Equivalent to<br>before<br>illness | Worse       | OR (univariable)             | OR (multilevel)              |
|------------------------------------|-----------------------|------------------------------------|-------------|------------------------------|------------------------------|
| Systemic<br>complication           | No                    | 26339 (73.7)                       | 9378 (26.3) | -                            | -                            |
|                                    | Yes                   | 3812 (56.1)                        | 2987 (43.9) | 2.20 (2.09-2.32,<br>p<0.001) | 2.39 (2.25-2.53,<br>p<0.001) |
| Age (years)                        | 19-29                 | 1121 (86.7)                        | 172 (13.3)  | -                            | -                            |
|                                    | 30-39                 | 1962 (83.7)                        | 383 (16.3)  | 1.27 (1.05-1.55,<br>p=0.015) | 1.66 (1.33-2.09,<br>p<0.001) |
|                                    | 40-49                 | 3331 (79.9)                        | 838 (20.1)  | 1.64 (1.38-1.96,<br>p<0.001) | 2.28 (1.85-2.82,<br>p<0.001) |
|                                    | 50-59                 | 5508 (78.8)                        | 1486 (21.2) | 1.76 (1.49-2.09,<br>p<0.001) | 2.46 (2.01-3.02,<br>p<0.001) |
|                                    | 60-69                 | 5451 (73.3)                        | 1990 (26.7) | 2.38 (2.02-2.82,<br>p<0.001) | 3.36 (2.74-4.11,<br>p<0.001) |
|                                    | 70-79                 | 6237 (66.5)                        | 3139 (33.5) | 3.28 (2.79-3.88,<br>p<0.001) | 4.66 (3.82-5.69,<br>p<0.001) |
| Sex at Birth                       | 80-89                 | 6069 (61.4)                        | 3810 (38.6) | 4.09 (3.48-4.84,<br>p<0.001) | 6.03 (4.94-7.36,<br>p<0.001) |
|                                    | 90+                   | 1940 (58.5)                        | 1377 (41.5) | 4.63 (3.89-5.52,<br>p<0.001) | 6.99 (5.68-8.62,<br>p<0.001) |
|                                    | Female                | 14550 (70.9)                       | 5968 (29.1) | -                            | -                            |
|                                    | Male                  | 17230 (70.2)                       | 7308 (29.8) | 1.03 (0.99-1.08,<br>p=0.107) | 1.10 (1.05-1.15,<br>p<0.001) |
| Deprivation                        | 1 (least<br>deprived) | 4468 (69.7)                        | 1946 (30.3) | -                            | -                            |
|                                    | 2                     | 5473 (70.0)                        | 2345 (30.0) | 0.98 (0.92-1.06,<br>p=0.655) | 0.98 (0.91-1.07,<br>p=0.687) |
|                                    | 3                     | 6751 (69.4)                        | 2983 (30.6) | 1.01 (0.95-1.09,<br>p=0.680) | 1.03 (0.95-1.12,<br>p=0.412) |
|                                    | 4                     | 7008 (70.2)                        | 2982 (29.8) | 0.98 (0.91-1.05,<br>p=0.504) | 1.09 (1.01-1.19,<br>p=0.031) |
|                                    | 5 (most<br>deprived)  | 8156 (72.8)                        | 3052 (27.2) | 0.86 (0.80-0.92,<br>p<0.001) | 1.03 (0.95-1.12,<br>p=0.429) |



| Dependent:<br>Self-care<br>ability |                       | Equivalent to<br>before<br>illness | Worse       | OR (univariable)             | OR (multilevel)              |
|------------------------------------|-----------------------|------------------------------------|-------------|------------------------------|------------------------------|
| Renal<br>complication              | No                    | 25847 (74.1)                       | 9039 (25.9) | -                            | -                            |
|                                    | Yes                   | 5287 (58.2)                        | 3791 (41.8) | 2.05 (1.95-2.15,<br>p<0.001) | 2.12 (2.01-2.23,<br>p<0.001) |
| Age (years)                        | 19-29                 | 1121 (86.7)                        | 172 (13.3)  | -                            | -                            |
|                                    | 30-39                 | 1962 (83.7)                        | 383 (16.3)  | 1.27 (1.05-1.55,<br>p=0.015) | 1.67 (1.34-2.10,<br>p<0.001) |
|                                    | 40-49                 | 3331 (79.9)                        | 838 (20.1)  | 1.64 (1.38-1.96,<br>p<0.001) | 2.25 (1.83-2.77,<br>p<0.001) |
|                                    | 50-59                 | 5508 (78.8)                        | 1486 (21.2) | 1.76 (1.49-2.09,<br>p<0.001) | 2.38 (1.95-2.91,<br>p<0.001) |
|                                    | 60-69                 | 5451 (73.3)                        | 1990 (26.7) | 2.38 (2.02-2.82,<br>p<0.001) | 3.27 (2.68-3.99,<br>p<0.001) |
|                                    | 70-79                 | 6237 (66.5)                        | 3139 (33.5) | 3.28 (2.79-3.88,<br>p<0.001) | 4.45 (3.66-5.43,<br>p<0.001) |
|                                    | 80-89                 | 6069 (61.4)                        | 3810 (38.6) | 4.09 (3.48-4.84,<br>p<0.001) | 5.72 (4.70-6.97,<br>p<0.001) |
|                                    | 90+                   | 1940 (58.5)                        | 1377 (41.5) | 4.63 (3.89-5.52,<br>p<0.001) | 6.61 (5.38-8.13,<br>p<0.001) |
| Sex at Birth                       | Female                | 14550 (70.9)                       | 5968 (29.1) | -                            | -                            |
|                                    | Male                  | 17230 (70.2)                       | 7308 (29.8) | 1.03 (0.99-1.08,<br>p=0.107) | 1.06 (1.01-1.11,<br>p=0.017) |
| Deprivation                        | 1 (least<br>deprived) | 4468 (69.7)                        | 1946 (30.3) | -                            | -                            |
|                                    | 2                     | 5473 (70.0)                        | 2345 (30.0) | 0.98 (0.92-1.06,<br>p=0.655) | 0.97 (0.89-1.05,<br>p=0.443) |
|                                    | 3                     | 6751 (69.4)                        | 2983 (30.6) | 1.01 (0.95-1.09,<br>p=0.680) | 1.02 (0.94-1.11,<br>p=0.590) |
|                                    | 4                     | 7008 (70.2)                        | 2982 (29.8) | 0.98 (0.91-1.05,<br>p=0.504) | 1.06 (0.98-1.15,<br>p=0.139) |
|                                    | 5 (most<br>deprived)  | 8156 (72.8)                        | 3052 (27.2) | 0.86 (0.80-0.92,<br>p<0.001) | 1.01 (0.94-1.10,<br>p=0.724) |

| Dependent: Self-care ability  |                    | Equivalent to before illness | Worse        | OR (univariable)          | OR (multilevel)           |
|-------------------------------|--------------------|------------------------------|--------------|---------------------------|---------------------------|
| Gastrointestinal complication | No                 | 29144 (71.4)                 | 11650 (28.6) | -                         | -                         |
|                               | Yes                | 2722 (62.1)                  | 1659 (37.9)  | 1.52 (1.43-1.63, p<0.001) | 1.95 (1.82-2.10, p<0.001) |
| Age (years)                   | 19-29              | 1121 (86.7)                  | 172 (13.3)   | -                         | -                         |
|                               | 30-39              | 1962 (83.7)                  | 383 (16.3)   | 1.27 (1.05-1.55, p=0.015) | 1.57 (1.27-1.95, p<0.001) |
|                               | 40-49              | 3331 (79.9)                  | 838 (20.1)   | 1.64 (1.38-1.96, p<0.001) | 2.14 (1.76-2.61, p<0.001) |
|                               | 50-59              | 5508 (78.8)                  | 1486 (21.2)  | 1.76 (1.49-2.09, p<0.001) | 2.39 (1.97-2.89, p<0.001) |
|                               | 60-69              | 5451 (73.3)                  | 1990 (26.7)  | 2.38 (2.02-2.82, p<0.001) | 3.37 (2.79-4.08, p<0.001) |
|                               | 70-79              | 6237 (66.5)                  | 3139 (33.5)  | 3.28 (2.79-3.88, p<0.001) | 4.75 (3.94-5.73, p<0.001) |
|                               | 80-89              | 6069 (61.4)                  | 3810 (38.6)  | 4.09 (3.48-4.84, p<0.001) | 6.14 (5.09-7.41, p<0.001) |
|                               | 90+                | 1940 (58.5)                  | 1377 (41.5)  | 4.63 (3.89-5.52, p<0.001) | 7.12 (5.85-8.67, p<0.001) |
| Sex at Birth                  | Female             | 14550 (70.9)                 | 5968 (29.1)  | -                         | -                         |
|                               | Male               | 17230 (70.2)                 | 7308 (29.8)  | 1.03 (0.99-1.08, p=0.107) | 1.09 (1.04-1.14, p<0.001) |
| Deprivation                   | 1 (least deprived) | 4468 (69.7)                  | 1946 (30.3)  | -                         | -                         |
|                               | 2                  | 5473 (70.0)                  | 2345 (30.0)  | 0.98 (0.92-1.06, p=0.655) | 0.97 (0.90-1.05, p=0.470) |
|                               | 3                  | 6751 (69.4)                  | 2983 (30.6)  | 1.01 (0.95-1.09, p=0.680) | 1.05 (0.97-1.13, p=0.262) |
|                               | 4                  | 7008 (70.2)                  | 2982 (29.8)  | 0.98 (0.91-1.05, p=0.504) | 1.09 (1.01-1.18, p=0.023) |
|                               | 5 (most deprived)  | 8156 (72.8)                  | 3052 (27.2)  | 0.86 (0.80-0.92, p<0.001) | 1.05 (0.97-1.13, p=0.272) |

| Dependent:<br>Self-care<br>ability |                       | Equivalent to<br>before<br>illness | Worse        | OR (univariable)             | OR (multilevel)              |
|------------------------------------|-----------------------|------------------------------------|--------------|------------------------------|------------------------------|
| Cardiovascular<br>complication     | No                    | 28222 (72.7)                       | 10600 (27.3) | -                            | -                            |
|                                    | Yes                   | 1957 (53.3)                        | 1716 (46.7)  | 2.33 (2.18-2.50,<br>p<0.001) | 2.18 (2.02-2.35,<br>p<0.001) |
| Age (years)                        | 19-29                 | 1121 (86.7)                        | 172 (13.3)   | -                            | -                            |
|                                    | 30-39                 | 1962 (83.7)                        | 383 (16.3)   | 1.27 (1.05-1.55,<br>p=0.015) | 1.69 (1.34-2.12,<br>p<0.001) |
|                                    | 40-49                 | 3331 (79.9)                        | 838 (20.1)   | 1.64 (1.38-1.96,<br>p<0.001) | 2.26 (1.83-2.79,<br>p<0.001) |
|                                    | 50-59                 | 5508 (78.8)                        | 1486 (21.2)  | 1.76 (1.49-2.09,<br>p<0.001) | 2.46 (2.00-3.01,<br>p<0.001) |
|                                    | 60-69                 | 5451 (73.3)                        | 1990 (26.7)  | 2.38 (2.02-2.82,<br>p<0.001) | 3.34 (2.73-4.08,<br>p<0.001) |
|                                    | 70-79                 | 6237 (66.5)                        | 3139 (33.5)  | 3.28 (2.79-3.88,<br>p<0.001) | 4.60 (3.77-5.62,<br>p<0.001) |
| Sex at Birth                       | 80-89                 | 6069 (61.4)                        | 3810 (38.6)  | 4.09 (3.48-4.84,<br>p<0.001) | 5.91 (4.84-7.21,<br>p<0.001) |
|                                    | 90+                   | 1940 (58.5)                        | 1377 (41.5)  | 4.63 (3.89-5.52,<br>p<0.001) | 6.74 (5.47-8.30,<br>p<0.001) |
|                                    | Female                | 14550 (70.9)                       | 5968 (29.1)  | -                            | -                            |
|                                    | Male                  | 17230 (70.2)                       | 7308 (29.8)  | 1.03 (0.99-1.08,<br>p=0.107) | 1.10 (1.05-1.15,<br>p<0.001) |
| Deprivation                        | 1 (least<br>deprived) | 4468 (69.7)                        | 1946 (30.3)  | -                            | -                            |
|                                    | 2                     | 5473 (70.0)                        | 2345 (30.0)  | 0.98 (0.92-1.06,<br>p=0.655) | 0.98 (0.90-1.06,<br>p=0.554) |
|                                    | 3                     | 6751 (69.4)                        | 2983 (30.6)  | 1.01 (0.95-1.09,<br>p=0.680) | 1.03 (0.95-1.12,<br>p=0.447) |
|                                    | 4                     | 7008 (70.2)                        | 2982 (29.8)  | 0.98 (0.91-1.05,<br>p=0.504) | 1.08 (1.00-1.18,<br>p=0.051) |
|                                    | 5 (most<br>deprived)  | 8156 (72.8)                        | 3052 (27.2)  | 0.86 (0.80-0.92,<br>p<0.001) | 1.03 (0.95-1.12,<br>p=0.507) |

| Dependent:<br>Self-care<br>ability |                       | Equivalent to<br>before<br>illness | Worse        | OR (univariable)             | OR (multilevel)              |
|------------------------------------|-----------------------|------------------------------------|--------------|------------------------------|------------------------------|
| Neurological<br>complication       | No                    | 29467 (72.4)                       | 11216 (27.6) | -                            | -                            |
|                                    | Yes                   | 645 (37.5)                         | 1074 (62.5)  | 4.37 (3.96-4.84,<br>p<0.001) | 4.35 (3.90-4.84,<br>p<0.001) |
| Age (years)                        | 19-29                 | 1121 (86.7)                        | 172 (13.3)   | -                            | -                            |
|                                    | 30-39                 | 1962 (83.7)                        | 383 (16.3)   | 1.27 (1.05-1.55,<br>p=0.015) | 1.68 (1.33-2.10,<br>p<0.001) |
|                                    | 40-49                 | 3331 (79.9)                        | 838 (20.1)   | 1.64 (1.38-1.96,<br>p<0.001) | 2.27 (1.84-2.81,<br>p<0.001) |
|                                    | 50-59                 | 5508 (78.8)                        | 1486 (21.2)  | 1.76 (1.49-2.09,<br>p<0.001) | 2.47 (2.02-3.03,<br>p<0.001) |
|                                    | 60-69                 | 5451 (73.3)                        | 1990 (26.7)  | 2.38 (2.02-2.82,<br>p<0.001) | 3.41 (2.78-4.17,<br>p<0.001) |
|                                    | 70-79                 | 6237 (66.5)                        | 3139 (33.5)  | 3.28 (2.79-3.88,<br>p<0.001) | 4.73 (3.87-5.78,<br>p<0.001) |
|                                    | 80-89                 | 6069 (61.4)                        | 3810 (38.6)  | 4.09 (3.48-4.84,<br>p<0.001) | 6.08 (4.98-7.43,<br>p<0.001) |
|                                    | 90+                   | 1940 (58.5)                        | 1377 (41.5)  | 4.63 (3.89-5.52,<br>p<0.001) | 6.97 (5.66-8.60,<br>p<0.001) |
| Sex at Birth                       | Female                | 14550 (70.9)                       | 5968 (29.1)  | -                            | -                            |
|                                    | Male                  | 17230 (70.2)                       | 7308 (29.8)  | 1.03 (0.99-1.08,<br>p=0.107) | 1.10 (1.05-1.15,<br>p<0.001) |
| Deprivation                        | 1 (least<br>deprived) | 4468 (69.7)                        | 1946 (30.3)  | -                            | -                            |
|                                    | 2                     | 5473 (70.0)                        | 2345 (30.0)  | 0.98 (0.92-1.06,<br>p=0.655) | 0.98 (0.91-1.07,<br>p=0.681) |
|                                    | 3                     | 6751 (69.4)                        | 2983 (30.6)  | 1.01 (0.95-1.09,<br>p=0.680) | 1.04 (0.96-1.13,<br>p=0.327) |
|                                    | 4                     | 7008 (70.2)                        | 2982 (29.8)  | 0.98 (0.91-1.05,<br>p=0.504) | 1.11 (1.02-1.20,<br>p=0.015) |
|                                    | 5 (most<br>deprived)  | 8156 (72.8)                        | 3052 (27.2)  | 0.86 (0.80-0.92,<br>p<0.001) | 1.03 (0.95-1.12,<br>p=0.465) |

| Dependent:<br>Self-care<br>ability |                       | Equivalent to<br>before<br>illness | Worse       | OR (univariable)             | OR (multilevel)              |
|------------------------------------|-----------------------|------------------------------------|-------------|------------------------------|------------------------------|
| Respiratory<br>complication        | No                    | 26878 (74.2)                       | 9360 (25.8) | -                            | -                            |
|                                    | Yes                   | 3380 (52.4)                        | 3069 (47.6) | 2.61 (2.47-2.75,<br>p<0.001) | 3.61 (3.39-3.84,<br>p<0.001) |
| Age (years)                        | 19-29                 | 1121 (86.7)                        | 172 (13.3)  | -                            | -                            |
|                                    | 30-39                 | 1962 (83.7)                        | 383 (16.3)  | 1.27 (1.05-1.55,<br>p=0.015) | 1.58 (1.25-1.99,<br>p<0.001) |
|                                    | 40-49                 | 3331 (79.9)                        | 838 (20.1)  | 1.64 (1.38-1.96,<br>p<0.001) | 2.02 (1.63-2.50,<br>p<0.001) |
|                                    | 50-59                 | 5508 (78.8)                        | 1486 (21.2) | 1.76 (1.49-2.09,<br>p<0.001) | 2.22 (1.80-2.72,<br>p<0.001) |
|                                    | 60-69                 | 5451 (73.3)                        | 1990 (26.7) | 2.38 (2.02-2.82,<br>p<0.001) | 3.24 (2.64-3.98,<br>p<0.001) |
|                                    | 70-79                 | 6237 (66.5)                        | 3139 (33.5) | 3.28 (2.79-3.88,<br>p<0.001) | 4.90 (4.00-6.00,<br>p<0.001) |
| Sex at Birth                       | 80-89                 | 6069 (61.4)                        | 3810 (38.6) | 4.09 (3.48-4.84,<br>p<0.001) | 6.63 (5.42-8.12,<br>p<0.001) |
|                                    | 90+                   | 1940 (58.5)                        | 1377 (41.5) | 4.63 (3.89-5.52,<br>p<0.001) | 7.59 (6.14-9.38,<br>p<0.001) |
|                                    | Female                | 14550 (70.9)                       | 5968 (29.1) | -                            | -                            |
|                                    | Male                  | 17230 (70.2)                       | 7308 (29.8) | 1.03 (0.99-1.08,<br>p=0.107) | 1.06 (1.02-1.11,<br>p=0.009) |
| Deprivation                        | 1 (least<br>deprived) | 4468 (69.7)                        | 1946 (30.3) | -                            | -                            |
|                                    | 2                     | 5473 (70.0)                        | 2345 (30.0) | 0.98 (0.92-1.06,<br>p=0.655) | 0.98 (0.90-1.06,<br>p=0.614) |
|                                    | 3                     | 6751 (69.4)                        | 2983 (30.6) | 1.01 (0.95-1.09,<br>p=0.680) | 1.03 (0.95-1.12,<br>p=0.419) |
|                                    | 4                     | 7008 (70.2)                        | 2982 (29.8) | 0.98 (0.91-1.05,<br>p=0.504) | 1.08 (1.00-1.17,<br>p=0.062) |
|                                    | 5 (most<br>deprived)  | 8156 (72.8)                        | 3052 (27.2) | 0.86 (0.80-0.92,<br>p<0.001) | 1.04 (0.96-1.13,<br>p=0.366) |

179

180

181

182

183

184

185 **Supplementary Figures**

186 **Supplementary figure 1** – Heatmap of co-occurrence of complications. Measured using the  
 187 Jaccard similarity index, where 1 is perfect co-occurrence and 0 is no co-occurrence.

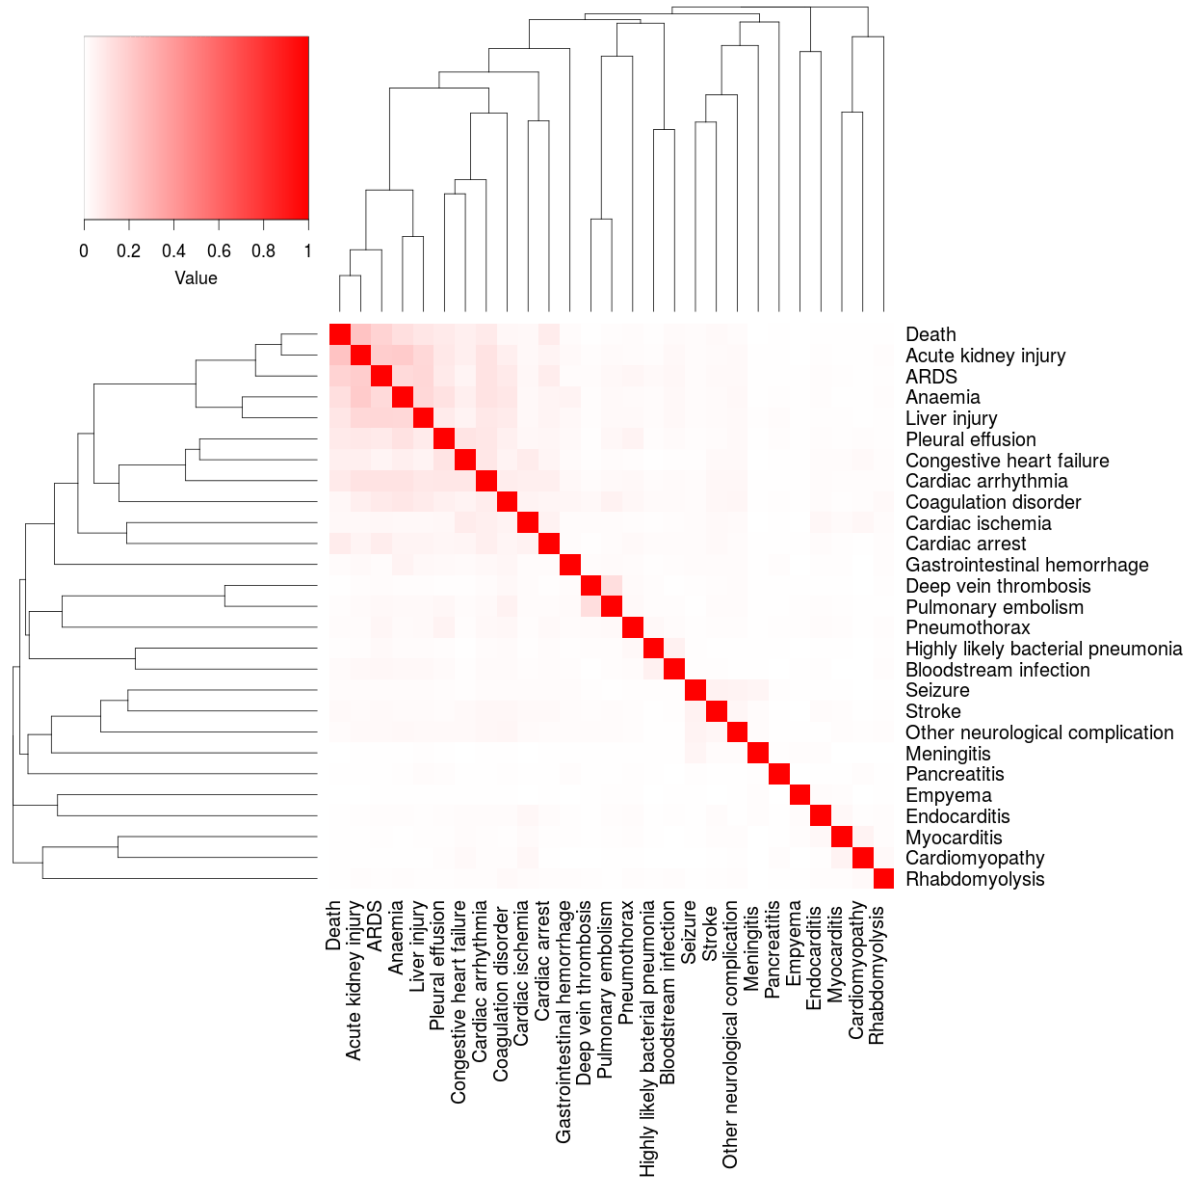

188

189 **Supplementary figure 2** - Adjusted effect of age and sex on organ specific complications in  
 190 adults with severe COVID-19 (also adjusted for centre as a random effect).

191

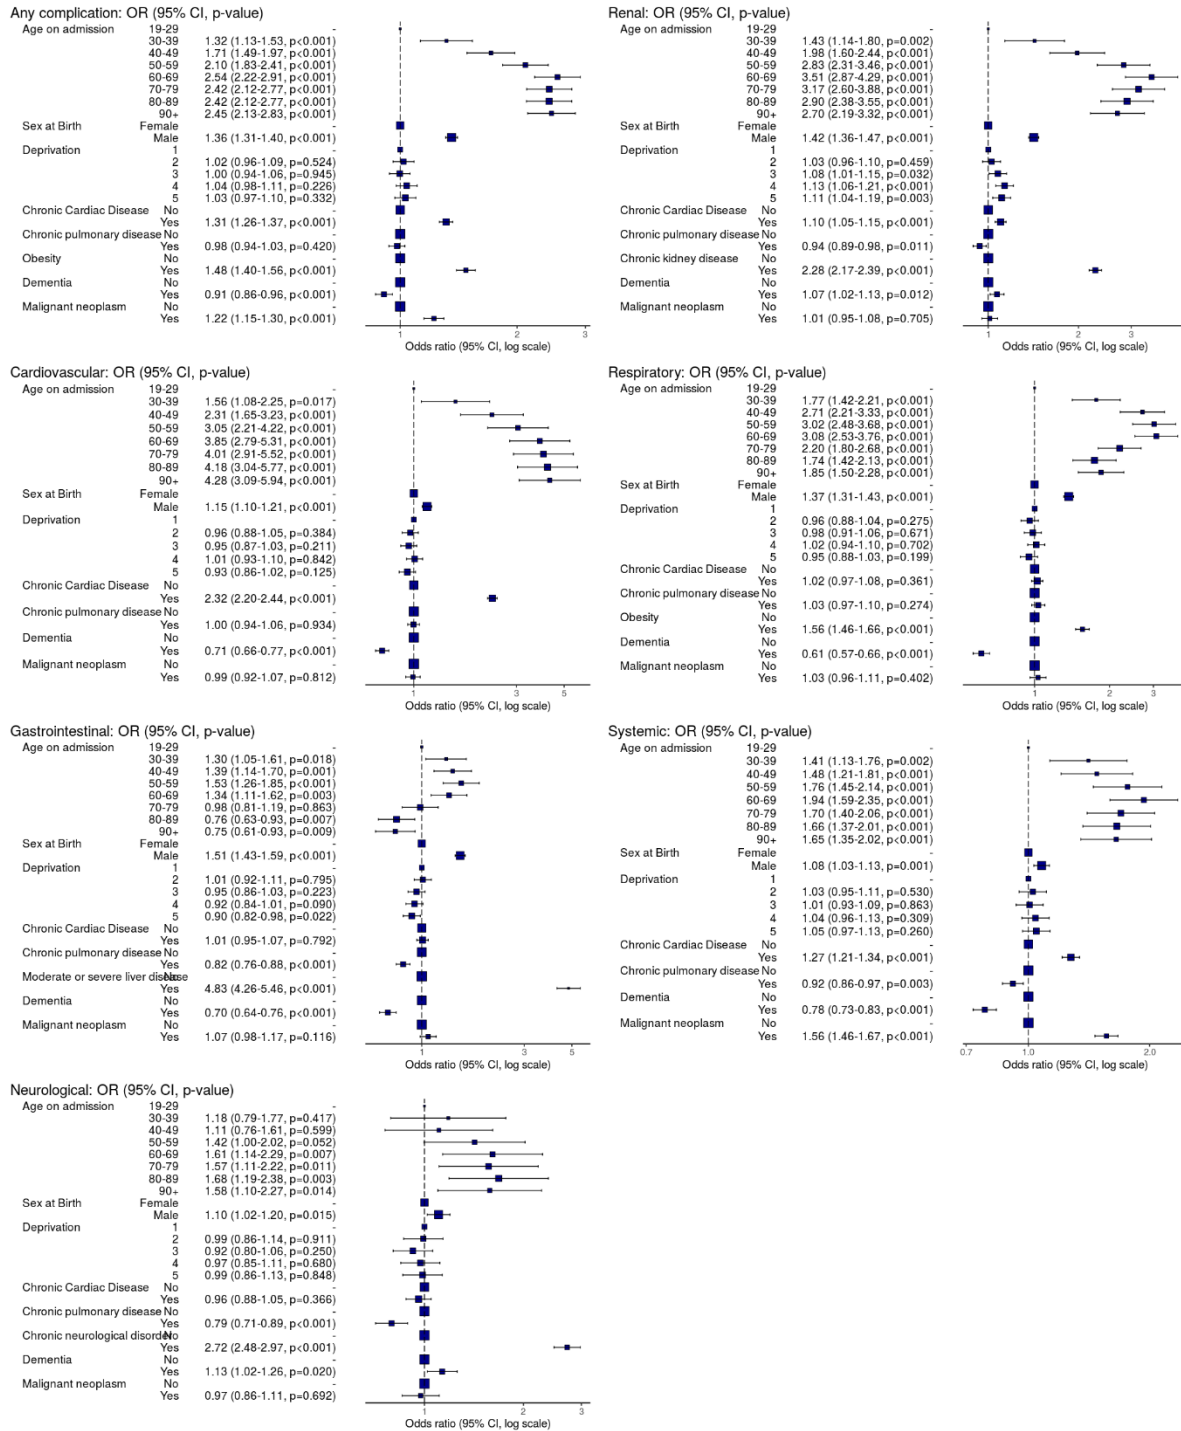

192

193 **Supplementary figure 3 - Effect of age, sex and deprivation on specific complications in adults**  
 194 with COVID-19 (also adjusted for centre as a random effect).

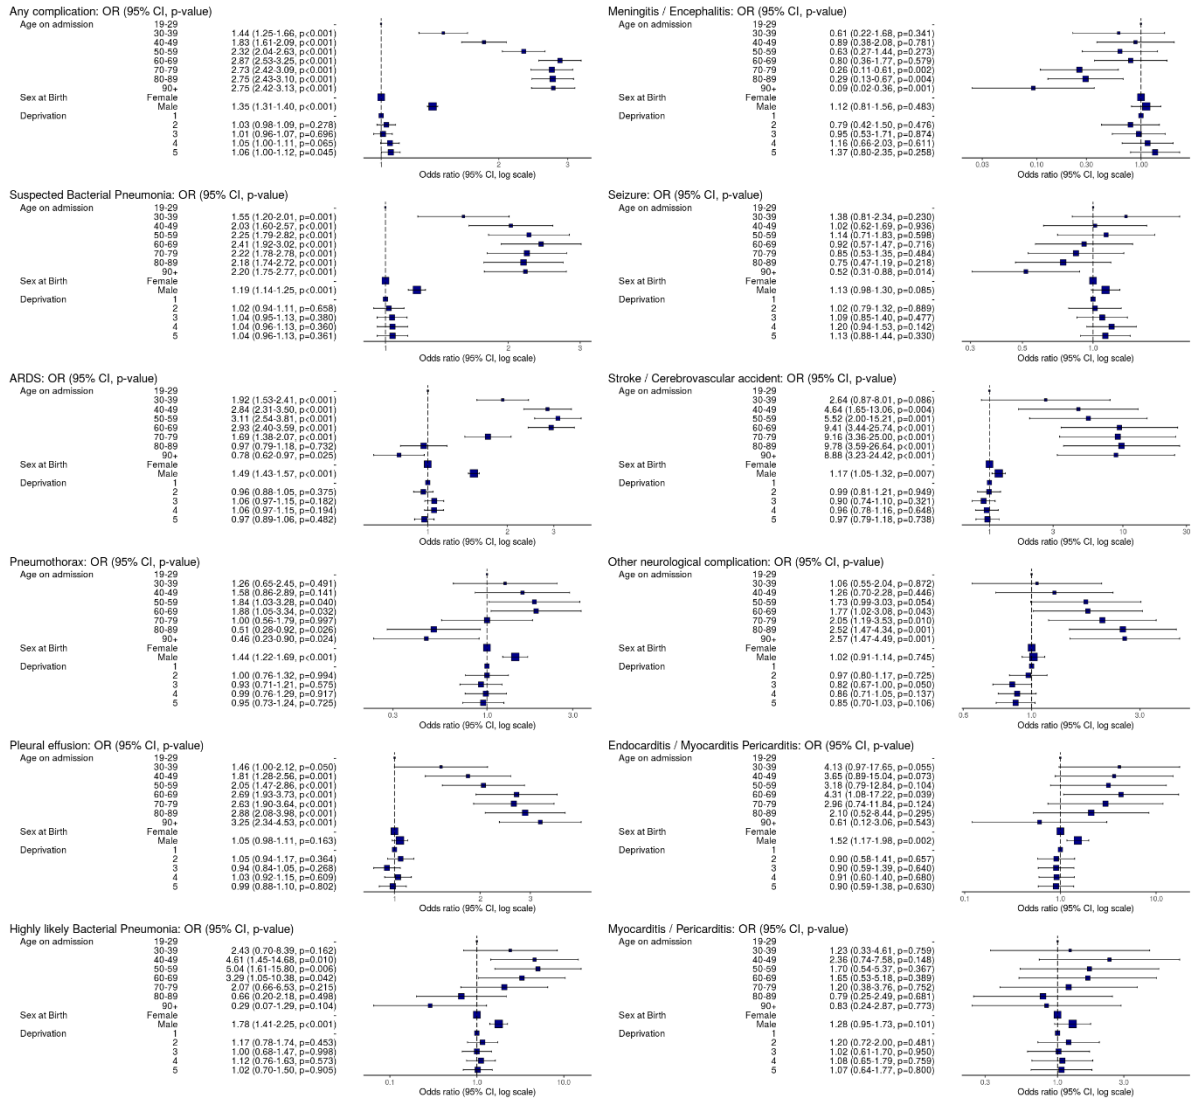



196 **Supplementary figure 3 (continued) - Effect of age, sex and deprivation on specific**  
 197 **complications in adults with COVID-19 (also adjusted for centre as a random effect).**

198

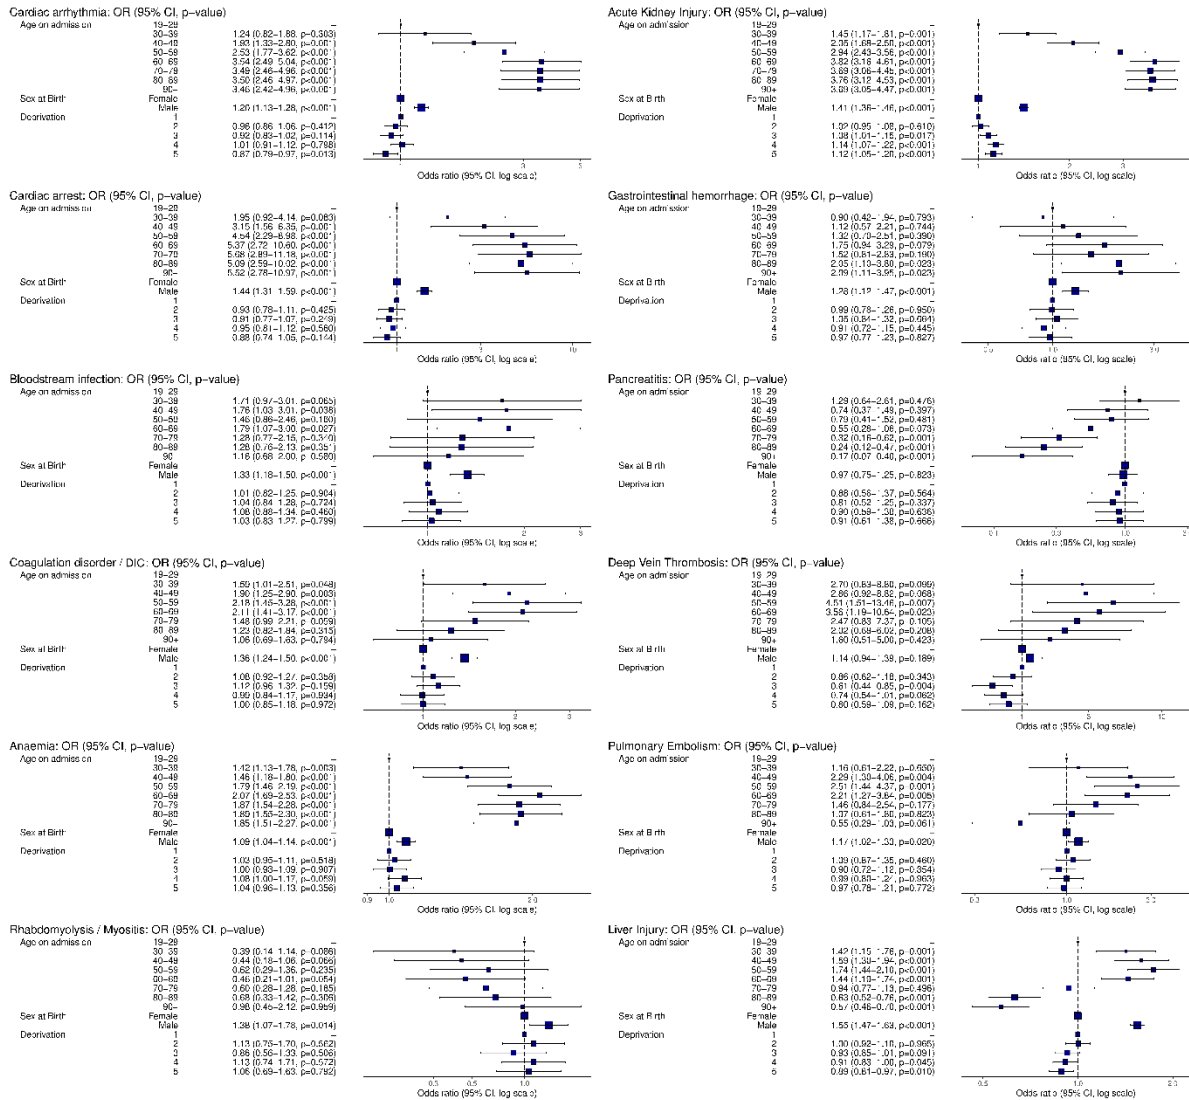

199

200 DIC- Disseminated intravascular coagulation.

201 **Supplementary figure 4 - Relationship between age, sex, comorbidities and adjusted**  
 202 **outcomes using generalised additive models. (A) Shows relationships for the outcome of**  
 203 **adjusted risk of systemic complications. (B) Shows relationships for the outcome of adjusted**  
 204 **mortality risk, stratified by presence of systemic complications. Each line represents one**  
 205 **bootstrap replicate (i.e. one simulated patient).**

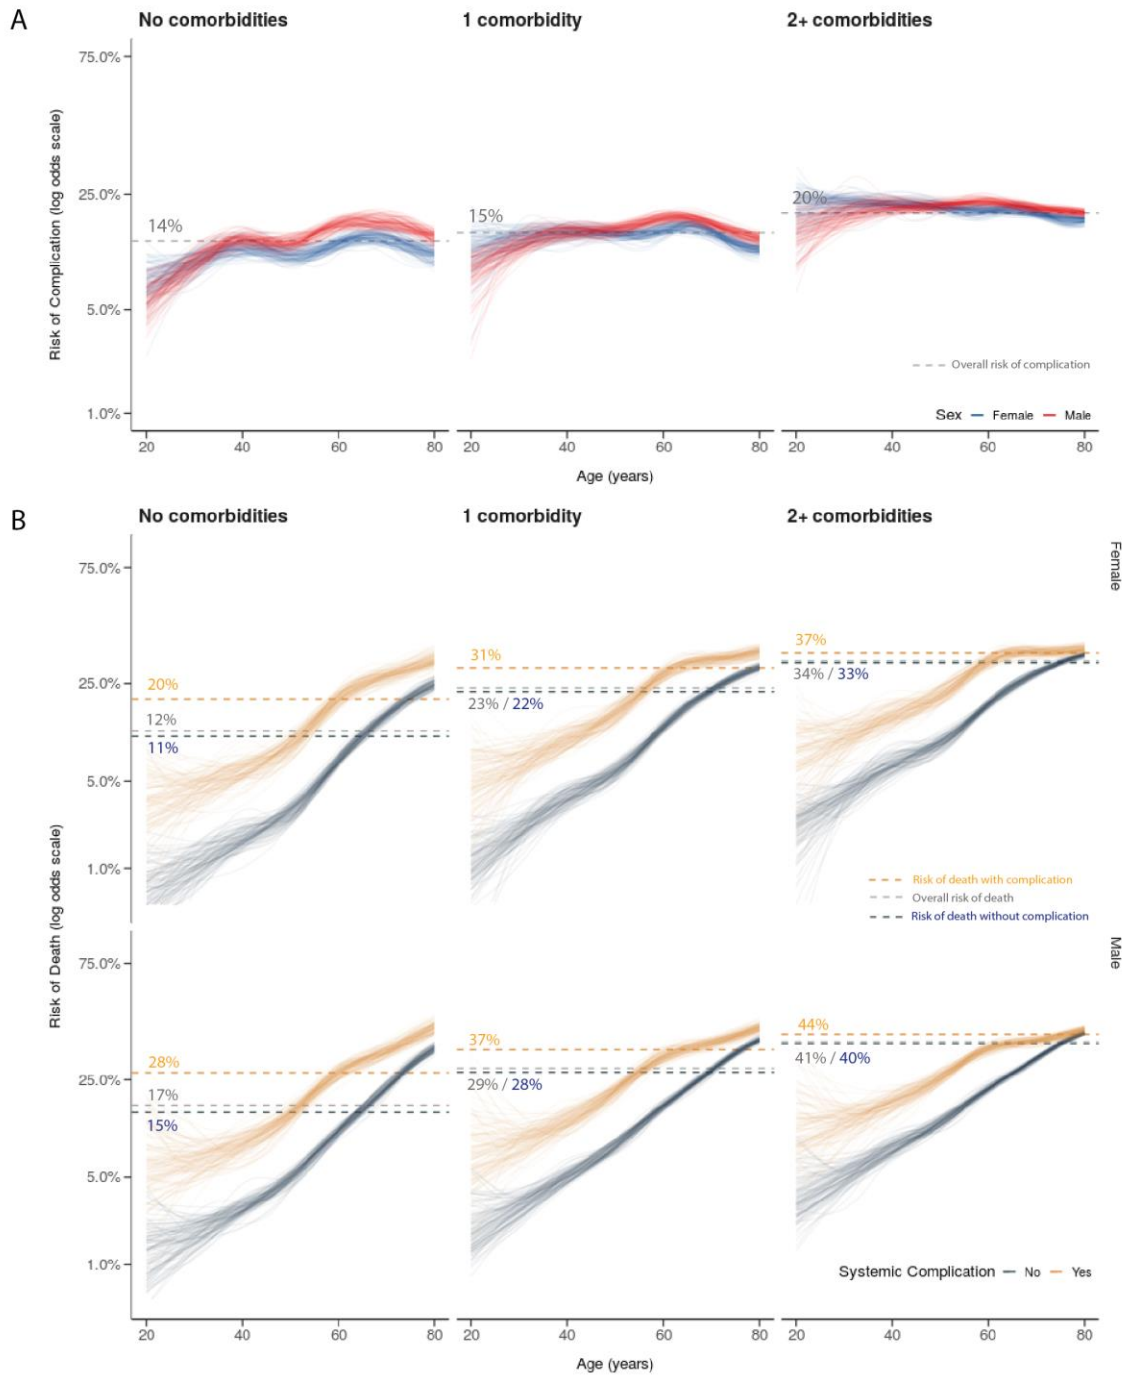

206

207 **Supplementary figure 5** - Relationship between age, sex, comorbidities and adjusted  
 208 outcomes using generalised additive models. (A) Shows relationships for the outcome of  
 209 adjusted risk of renal complications. (B) Shows relationships for the outcome of adjusted  
 210 mortality risk, stratified by presence of renal complications. Each line represents one bootstrap  
 211 replicate (i.e. one simulated patient).

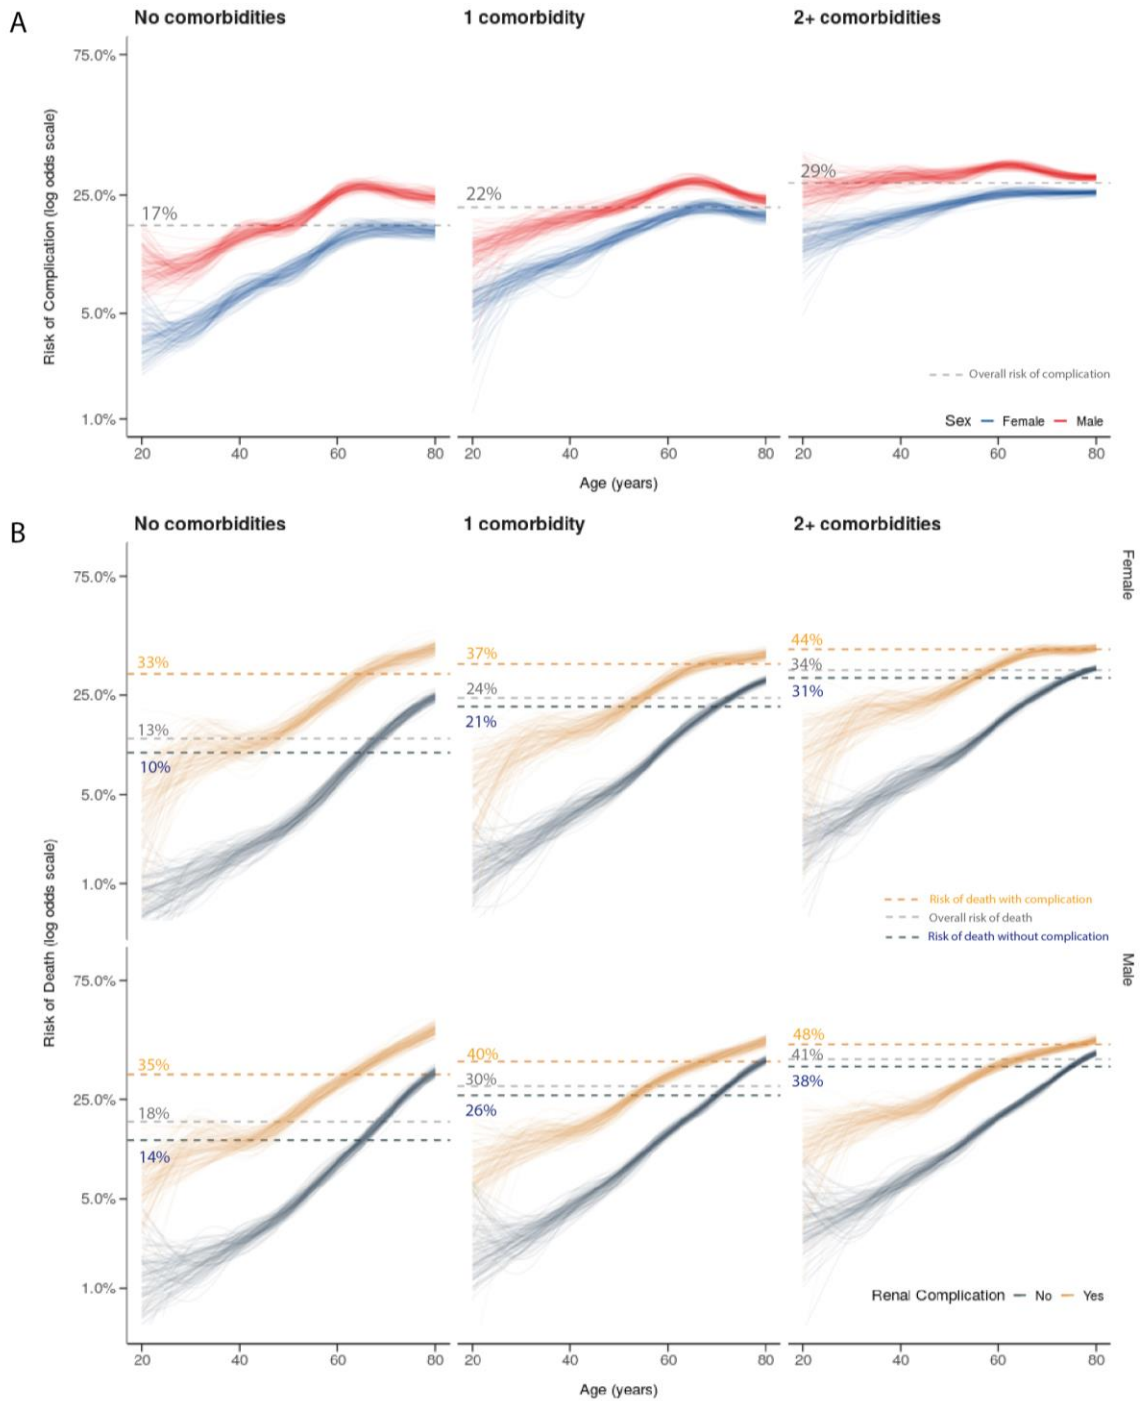

212

213 **Supplementary figure 6** - Relationship between age, sex, comorbidities and adjusted  
 214 outcomes using generalised additive models. (A) Shows relationships for the outcome of  
 215 adjusted risk of gastrointestinal or liver complications. (B) Shows relationships for the outcome  
 216 of adjusted mortality risk, stratified by presence of gastrointestinal or liver complications. Each  
 217 line represents one bootstrap replicate (i.e. one simulated patient).

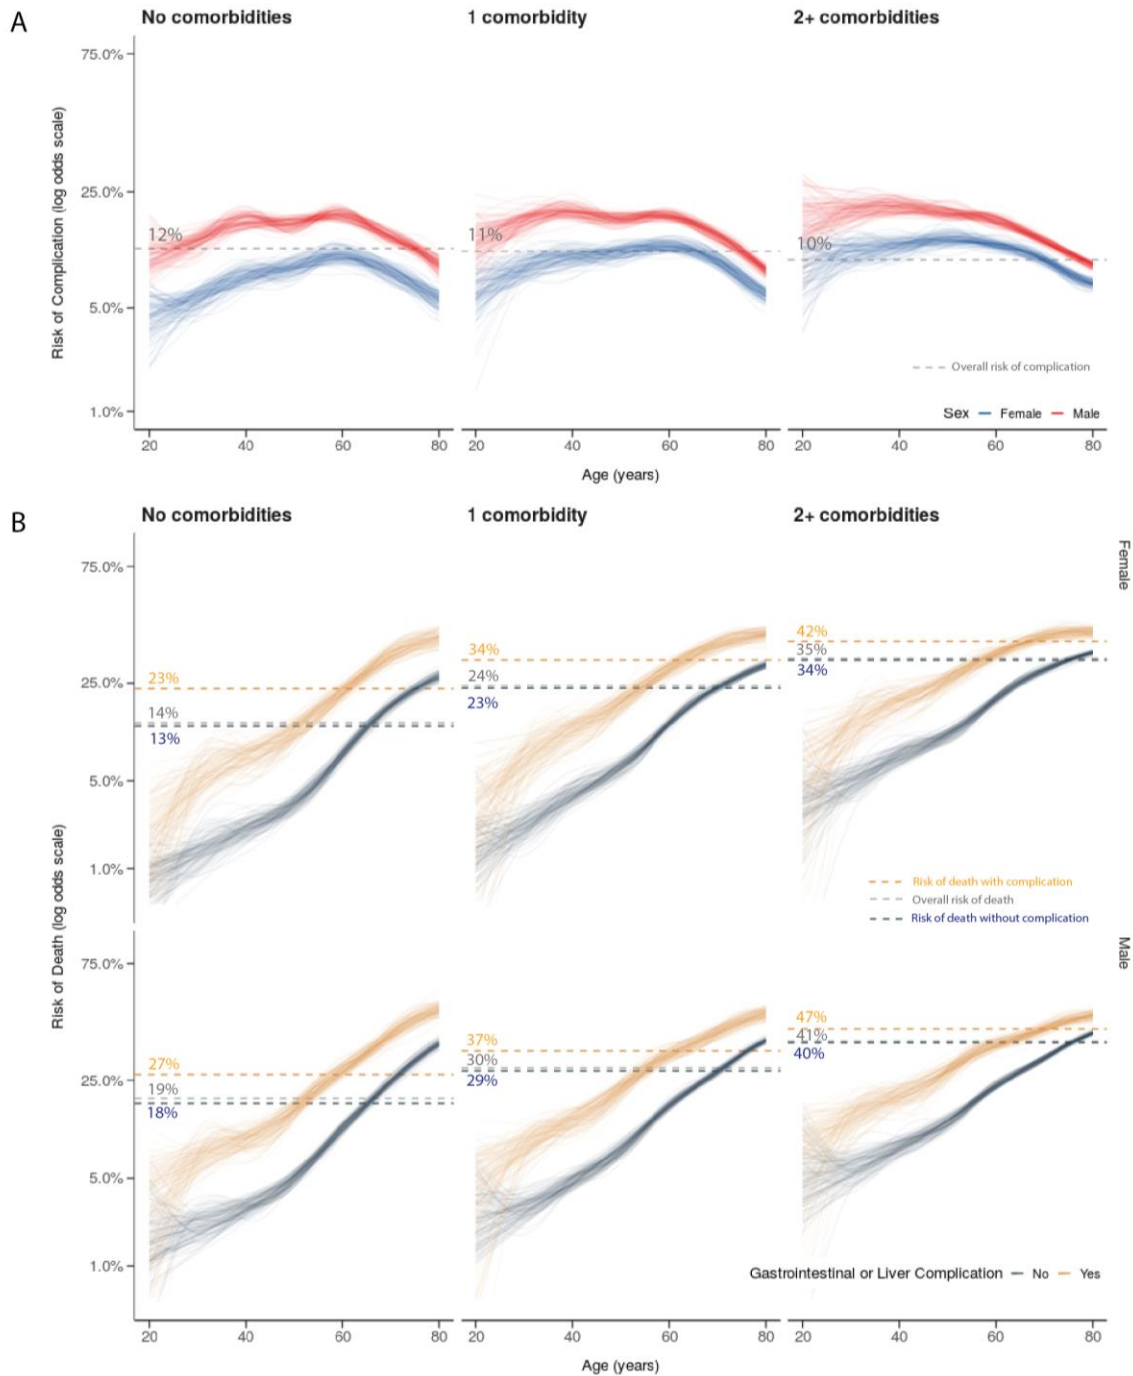

218

219 **Supplementary figure 7** - Relationship between age, sex, comorbidities and adjusted  
 220 outcomes using generalised additive models. (A) Shows relationships for the outcome of  
 221 adjusted risk of cardiovascular complications. (B) Shows relationships for the outcome of  
 222 adjusted mortality risk, stratified by presence of cardiovascular complications. Each line  
 223 represents one bootstrap replicate (i.e. one simulated patient).

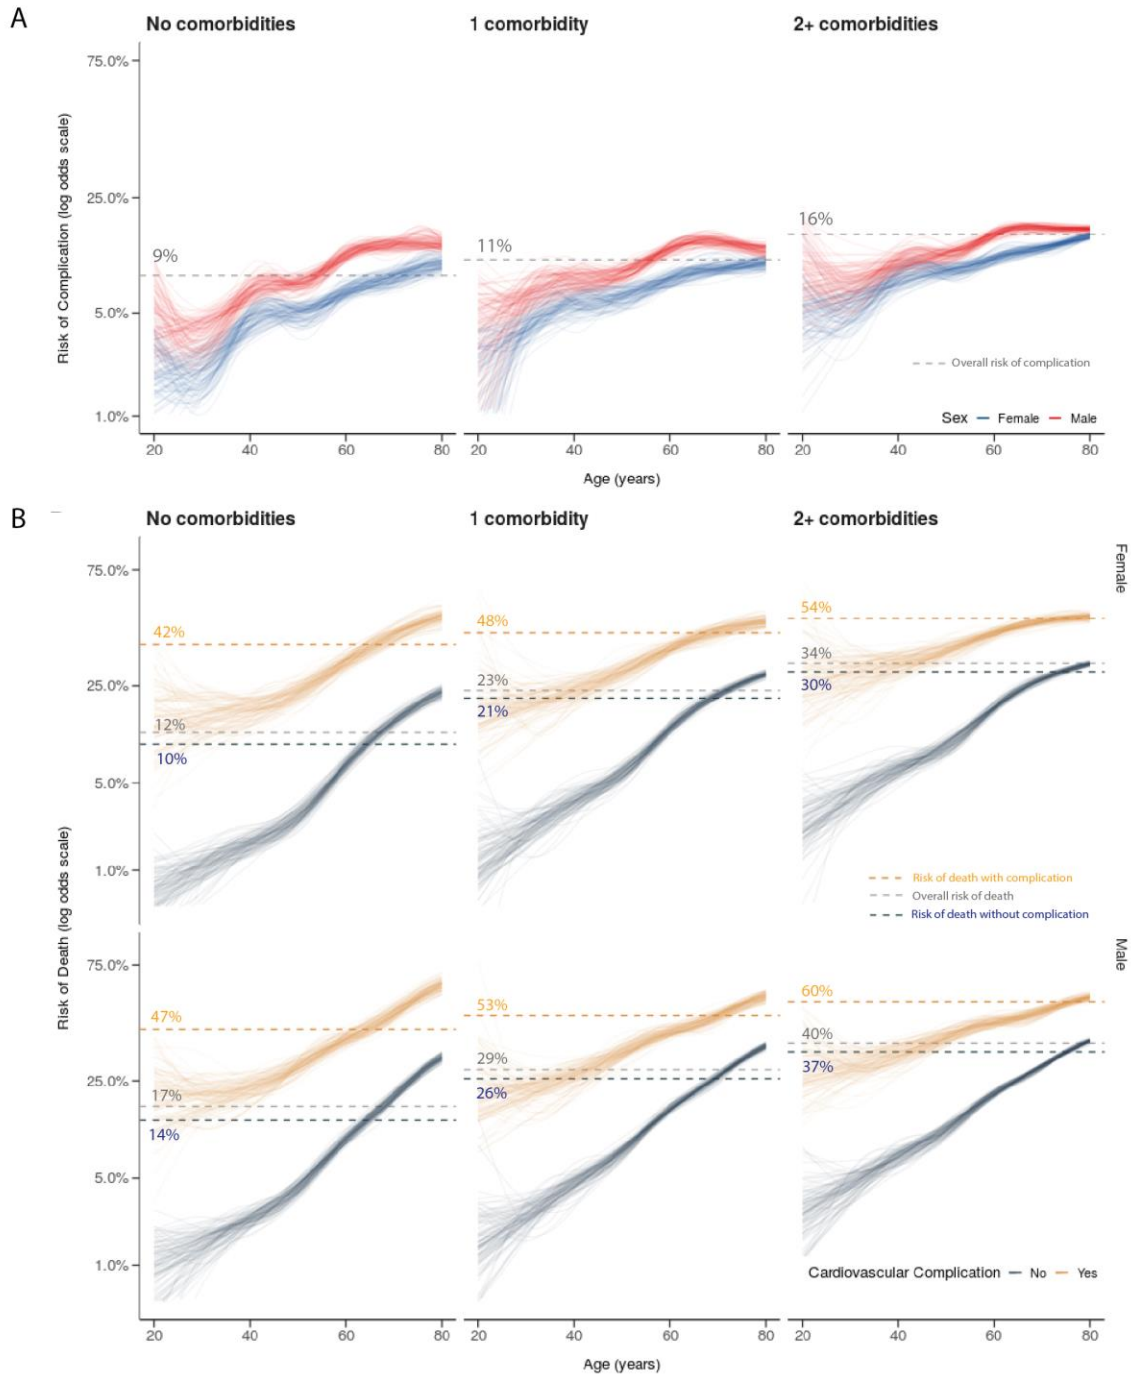

224

225 **Supplementary figure 8** - Relationship between age, sex, comorbidities and adjusted  
 226 outcomes using generalised additive models. (A) Shows relationships for the outcome of  
 227 adjusted risk of neurological complications. (B) Shows relationships for the outcome of adjusted  
 228 mortality risk, stratified by presence of neurological complications. Each line represents one  
 229 bootstrap replicate (i.e. one simulated patient).

230

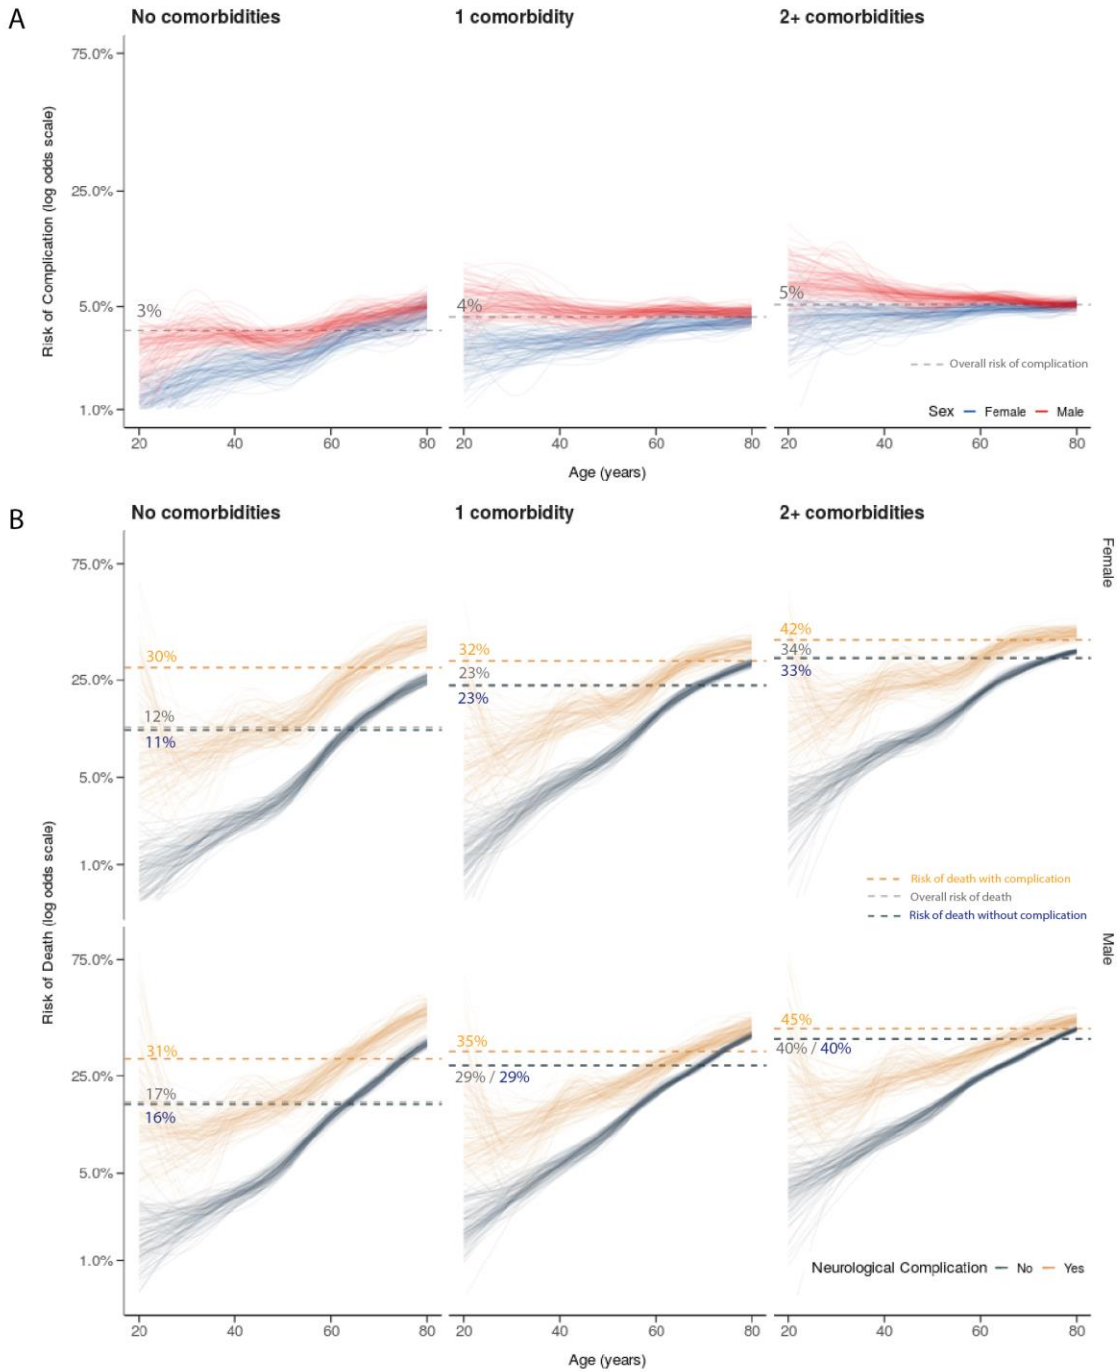

231



232 **Supplementary figure 9** - Relationship between age, sex, comorbidities and adjusted  
 233 outcomes using generalised additive models. (A) Shows relationships for the outcome of  
 234 adjusted risk of respiratory complications. (B) Shows relationships for the outcome of adjusted  
 235 mortality risk, stratified by presence of respiratory complications. Each line represents one  
 236 bootstrap replicate (i.e. one simulated patient).

237

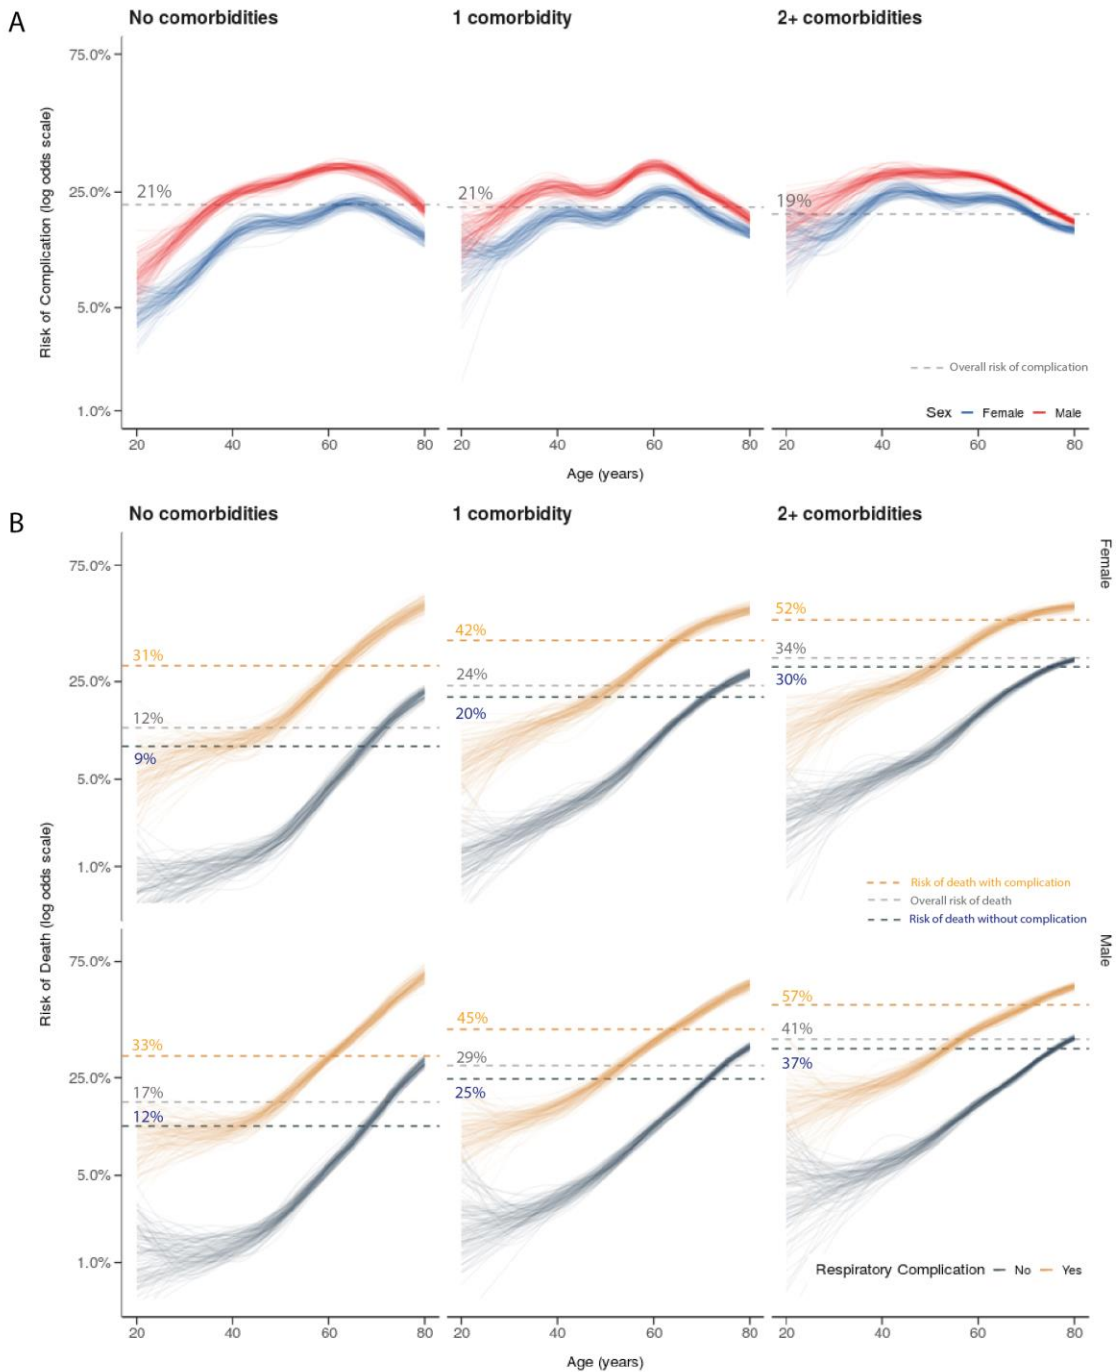

238

239 **Supplementary figure 11** - Associations between specific comorbidities and organ specific  
 240 complications in adults with severe COVID-19.

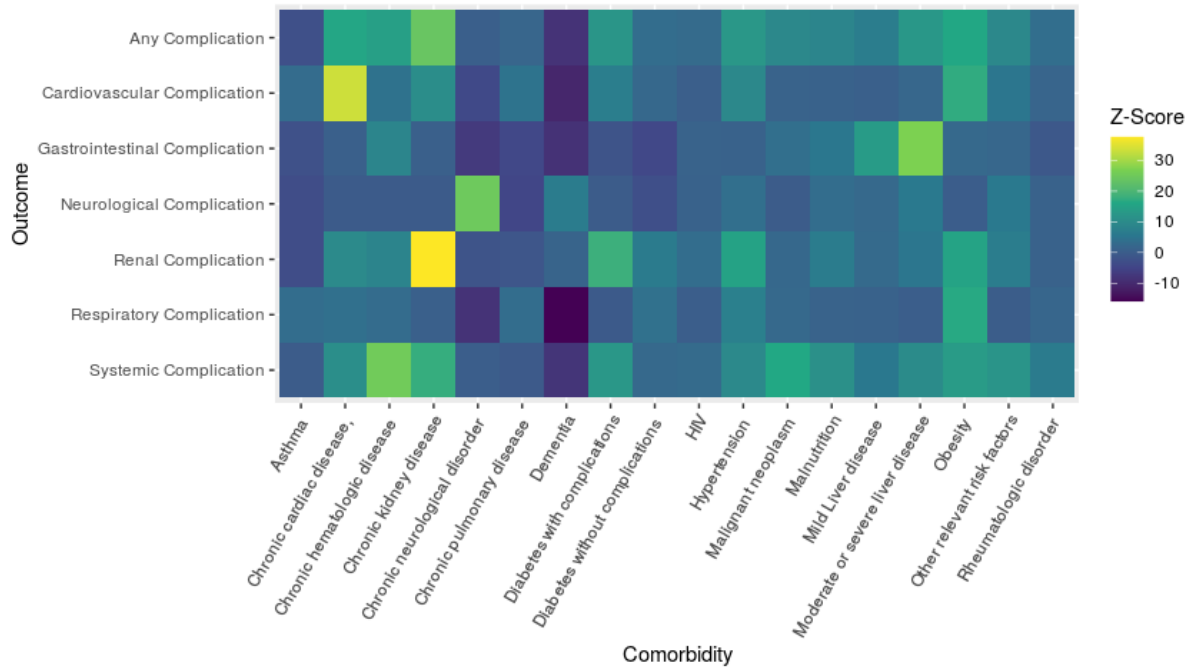

241  
 242 *A positive Z-score represents stronger associations between variables in positive direction, whereas negative z-score*  
 243 *represents effect in opposite direction.*



244 **Supplementary figure 12 - Effect of specific comorbidities on specific complications in adults**  
 245 **with COVID-19.**

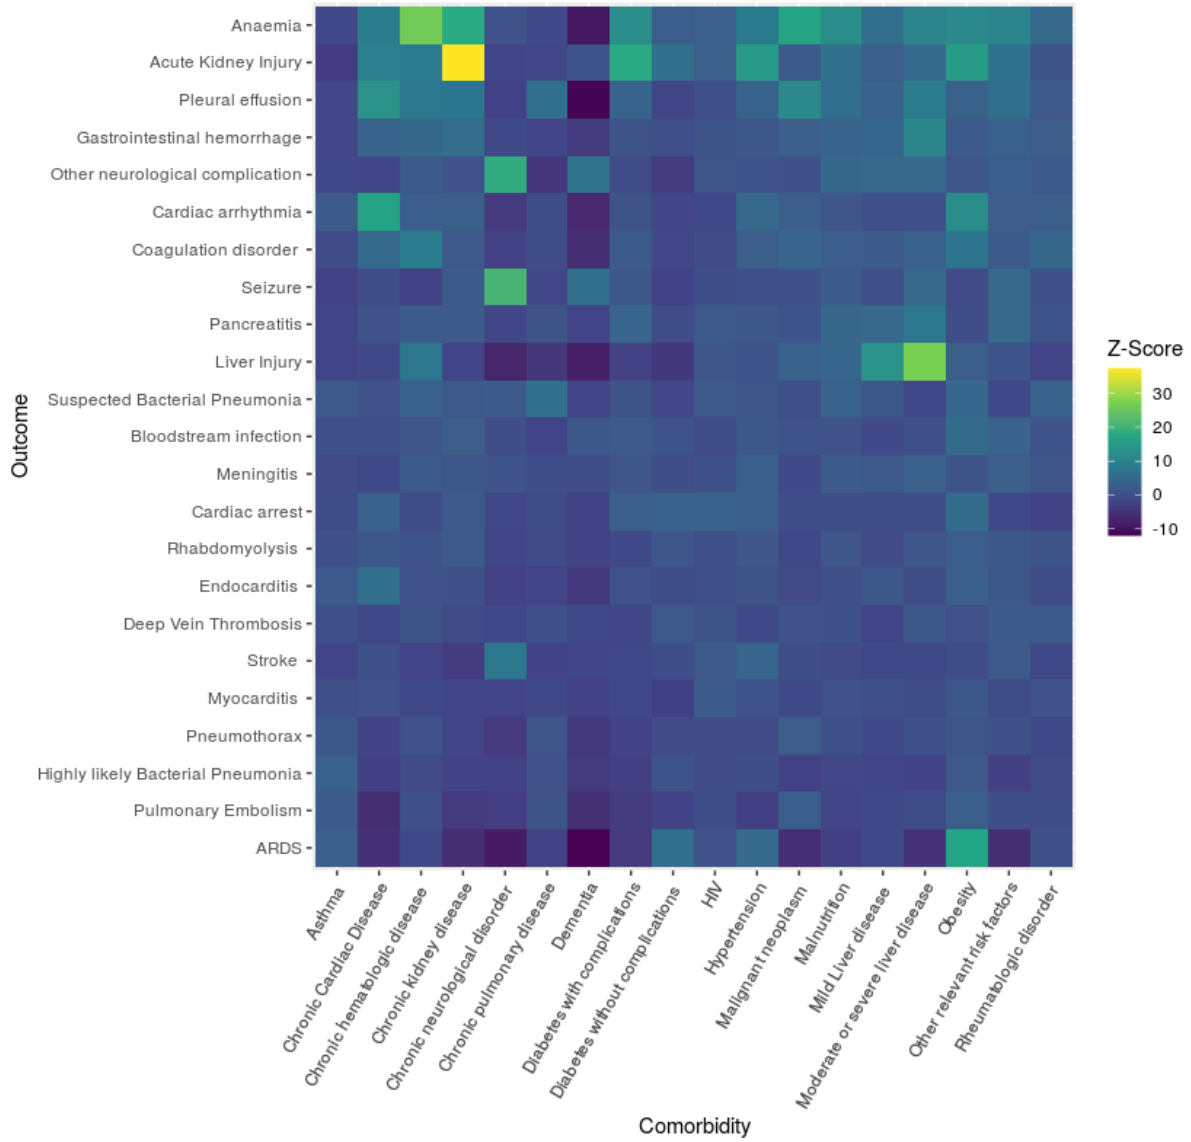

246  
 247 *A positive Z-score represents stronger associations between variables in positive direction, whereas negative z-score*  
 248 *represents effect in opposite direction.*  
 249

250 **Supplementary figure 13** – Probability of complication by admission severity score and  
 251 symptoms in those who survived. (A) ISARIC 4C mortality score against proportion of patients  
 252 experiencing any complication. (B) National Early Warning Score 2 against proportion of  
 253 patients experiencing any complication. (C) Quick Sequential Organ Failure Assessment score  
 254 against proportion of patients experiencing any complication. (D) Total number of symptoms on  
 255 admission against proportion of patients experiencing any complication. For continuous  
 256 outcomes (4C score, NEWS2 and number of symptoms), red line shows smoothed conditional  
 257 mean line using generalised additive model. Higher scores indicate critical illness.

A

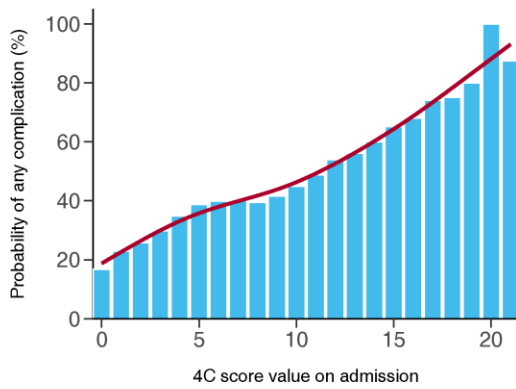

B

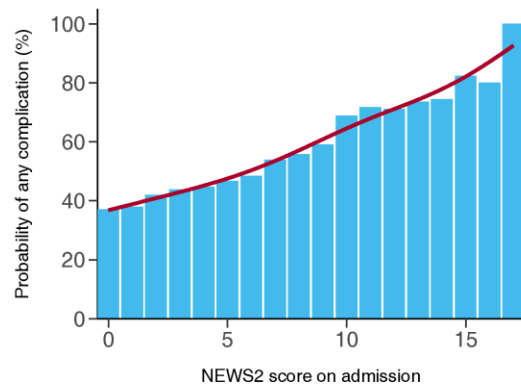

C

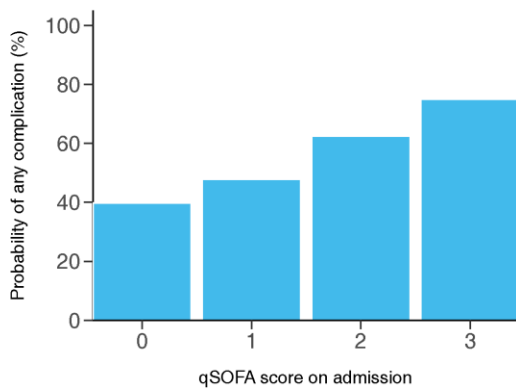

D

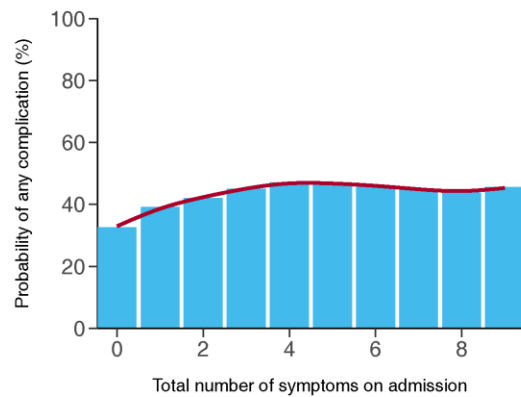

258
